1 **Title page**

2 **Full title:**

3 **Studying the context of psychoses to improve outcomes in Ethiopia (SCOPE): protocol paper**

4

5 Charlotte Hanlon<sup>1,2,3,\*</sup>

6 Tessa Roberts<sup>1,4</sup>

7 Eleni Misganaw<sup>5</sup>

8 Ashok Malla<sup>6</sup>

9 Alex Cohen<sup>7</sup>

10 Teshome Shibre<sup>8</sup>

11 Wubalem Fekadu<sup>2</sup>

12 Solomon Teferra<sup>2</sup>

13 Derege Kebede<sup>9</sup>

14 Adiyam Mulushoa<sup>2</sup>

15 Zerihun Girma<sup>2</sup>

16 Mekonnen Tsehay<sup>2</sup>

17 Dessalegn Kiross<sup>10</sup>

18 Crick Lund<sup>1,11</sup>

19 Abebaw Fekadu<sup>2,3</sup>

20 Craig Morgan<sup>4</sup>

21 Atalay Alem<sup>2</sup>

22

23 <sup>1</sup>Centre for Global Mental Health, Health Service and Population Research Department, Institute of  
24 Psychiatry, Psychology and Neuroscience, King's College London, London, UK

25 <sup>2</sup>Department of Psychiatry and WHO Collaborating Centre in Mental Health Research and Capacity  
26 Building, School of Medicine, College of Health Sciences, Addis Ababa University, Addis Ababa,  
27 Ethiopia

28 <sup>3</sup>Centre for Innovative Drug Development and Therapeutic Trials for Africa (CDT-Africa), College of  
29 Health Sciences, Addis Ababa University, Addis Ababa, Ethiopia

30 <sup>4</sup>ESRC Centre for Society & Mental Health, King's College London, London, UK

31 <sup>5</sup>Mental Health Service User Association, Addis Ababa, Ethiopia

32 <sup>6</sup>McGill University, Department of Psychiatry and Douglas Mental Health Institute

**NOTE: This preprint reports new research that has not been certified by peer review and should not be used to guide clinical practice.**

33 <sup>7</sup>Department of Population Health, London School of Hygiene and Tropical Medicine, London, UK

34 <sup>8</sup>Horizon Health Network Zone 3, New Brunswick, Canada.

35 <sup>9</sup>Department of Preventive Medicine, School of Public Health, School of Medicine, College of Health  
36 Sciences, Addis Ababa University, Addis Ababa, Ethiopia

37 <sup>10</sup>Victoria University of Wellington, School of Nursing, Midwifery, and Health practice

38 <sup>11</sup>Alan J Flisher Centre for Public Mental Health, Department of Psychiatry and Mental Health,  
39 University of Cape Town, Cape Town, South Africa

40

41

42 \*Corresponding author: Charlotte Hanlon: [charlotte.hanlon@kcl.ac.uk](mailto:charlotte.hanlon@kcl.ac.uk)

43

44 **Funding:** Wellcome 222154/Z20/Z

45 **Competing interests:** None

46 **Data availability:** Open access in line with Wellcome policy

47 **Short title:** SCOPE

48

49 **Author contributions**

50 CH, TR, EM, AM, AC, ST, CL, AF, CM, AA conceptualised the overarching research goals and aims, and

51 contributed to funding acquisition. All authors contributed to development of methodology. CH

52 prepared the first draft. All authors contributed to reviewing and editing drafts to produce the final

53 manuscript. All authors approved the final submitted version of the manuscript.

54

55

56 **Abstract**

57 Background

58 Global evidence on psychosis is dominated by studies conducted in Western, high-income countries.  
59 The objectives of the Study of Context Of Psychoses to improve outcomes in Ethiopia (SCOPE) are (1)  
60 to generate rigorous evidence of psychosis experience, epidemiology and impacts in Ethiopia that  
61 will illuminate aetiological understanding and (2) inform development and testing of interventions  
62 for earlier identification and improved first contact care that are scalable, inclusive of difficult-to-  
63 reach populations and optimise recovery.

64 Methods

65 The setting is sub-cities of Addis Ababa and rural districts in south-central Ethiopia covering 1.1  
66 million people and including rural, urban and homeless populations. SCOPE comprises (i) formative  
67 work to understand care pathways and community resources (resource mapping); examine family  
68 context and communication (ethnography); develop valid measures of family communication and  
69 personal recovery; and establish platforms for community engagement and involvement of people  
70 with lived experience; (ii) a population-based incidence study, case-control study and cohort study  
71 with 12 months follow-up involving 440 people with psychosis (390 rural/Addis Ababa; 50 who are  
72 homeless), 390 relatives and 390 controls. We will test hypotheses about incidence rates in rural vs.  
73 urban populations and men vs. women; potential aetiological role of khat (a commonly chewed  
74 plant with amphetamine-like properties) and traumatic exposures in psychosis; determine profiles of  
75 needs at first contact and predictors of outcome; (iii) participatory workshops to develop  
76 programme theory and inform co-development of interventions, (iv) evaluation of the impact of  
77 early identification strategies on engagement with care (interrupted time series study); (v) a  
78 feasibility cluster randomised controlled trial of interventions for people with recent-onset psychosis  
79 in rural settings (10-12 clusters; n=80 participants) with 6 months follow-up to inform a future large-  
80 scale trial and investigate implementation processes and outcomes, and (vi) two uncontrolled pilot

81 studies to test acceptability, feasibility of co-developed interventions in urban and homeless  
82 populations.

83

84 Keywords

85 Community case identification; Early intervention psychosis; Duration of untreated psychosis;

86 community mental health; Africa

87

88

89

## 90 **Background**

91 Psychoses, such as schizophrenia, affect more than 23 million people worldwide, contribute  
92 substantially to the global burden of disease and are associated with high rates of disability and  
93 mortality [1], particularly in low resource settings where most never receive treatment [2]. The  
94 onset of psychosis is mostly in late adolescence and early adulthood, increasing the salience to low-  
95 and middle-income countries (LMICs) with younger population profiles. Nonetheless, although over  
96 85% of the world's population lives in Asia, Africa, Latin America, and the Caribbean, less than 10%  
97 of psychosis research is carried out in these settings [3]. Consequently, our knowledge of the early  
98 stages of psychoses, especially of the basic epidemiology, risk factors, and early course and  
99 outcome, is based almost entirely on research from North America, Western Europe, and Australia.  
100 Recent evidence indicates that psychoses are highly heterogeneous in their distribution, aetiology,  
101 incidence, presentation and outcome [3]. Population-based research in more diverse contexts on  
102 incidence, and predictors of onset and outcomes among representative samples of people with  
103 psychosis is critical to develop appropriate evidence-based interventions [4].

104

105 There has been relative neglect of psychosis in global mental health research [5], with very few  
106 methodologically robust population-based studies of psychosis in LMICs [3]. Most existing studies  
107 are based either on clinical samples, likely to be highly unrepresentative of the wider population as  
108 only a small proportion of people with psychosis access mental health services [6, 7], or on those  
109 with long duration of illness in community settings [8]. The ongoing INTREPID II programme in India,  
110 Nigeria and Trinidad [9], based on extensive pilot work [10-12], provides methodology that is  
111 feasible to implement in diverse LMICs, thus enabling cross-country comparisons. To date INTREPID  
112 methods have not been applied in low-income or Eastern African countries. This is an important gap,  
113 given the great diversity of health systems, health profiles, burdens of disease, and social, economic  
114 and cultural factors across Africa.

115  
116 In Ethiopia, SCOPE will align with INTREPID epidemiological methods and build on two  
117 internationally-recognised community-based studies of people with psychosis: the Butajira course  
118 and outcome study ('Butajira study') [13, 14] and the PRIME (Programme for Improving Mental  
119 health carE) study [15, 16]. In the Butajira study, an epidemiological sample of 359 people with  
120 clinician-confirmed diagnoses of schizophrenia was recruited through community case-finding  
121 methods and followed up for an average of 10 years [13, 14]. Important findings from this study  
122 were: a high treatment gap (90% lifetime), long duration of untreated psychosis (DUP; mean 7.6  
123 years), 7% street homelessness at baseline [8, 17, 18]; low rates of complete remission [13], high  
124 suicide attempt rates [19] and higher levels of disability [20, 21], perpetrated violence and violent  
125 victimisation [22] and premature mortality (27.7 years of life lost; standardised mortality ratio 302.7)  
126 [23] compared with the general population. Transgenerational transmission of disadvantage was  
127 shown [24], with high levels of caregiver burden [25], economic impact [26] and experience of  
128 stigma [27]. In the PRIME study, 300 people with severe mental illness (85.3% with primary  
129 psychosis) were detected in the community [28, 29]. Key findings were lifetime and current access  
130 gaps for biomedical care of 41.8% and 59.9%, respectively, with corresponding figures for faith and  
131 traditional healing of 15.1% and 45.2% [7]; only 11.3% received minimally adequate biomedical care  
132 in current episode [7]; long DUP (median 5 years); high rates of restraint (25.3% in the preceding 12  
133 months); high exposure to traumatic events [7, 30], high lifetime experience of homelessness  
134 (36.3%) [7], higher discrimination in urban residents [31]; higher poverty [32, 33] and food insecurity  
135 [34] compared to population controls. Both the Butajira and PRIME studies were limited by potential  
136 prevalence bias and limited recruitment from religious healing sites.

137  
138 In the Butajira and PRIME studies, potentially salient psychosocial risk factors and outcomes for the  
139 Ethiopian context were not examined. The evidence gaps about potential risk factors (khat use,

140 trauma exposure), targets for intervention (family communication) and outcomes (personal  
141 recovery) will now be described.

142 (i) Khat use: Khat leaves contain *Catha Edulis*, an amphetamine-like substance [35]. Khat is  
143 widely used across the Horn of Africa and its diaspora [36, 37]. In Ethiopia, use is  
144 increasing, with 15.8% nationally reporting current use [38], but over 50% of adults in  
145 some districts [39] and high levels in students [40]. In a case-control study from Somalia,  
146 age of onset of khat use was associated with clinical ratings of current psychotic  
147 symptoms [41], indicating a potential role as a risk factor for onset of primary psychosis.  
148 However, the relationship between culturally relevant patterns of khat use [42] and  
149 incidence and early course of psychoses has not been investigated.

150 (ii) Trauma: In studies conducted in high-income countries, co-morbidity of post-traumatic  
151 stress disorder (PTSD) in people with psychosis ranges from 13-55% [43]. Exposure to  
152 traumatic events is a risk factor for developing psychosis [44] and associated with poorer  
153 outcomes [45]. In LMICs, traumatic experiences are prevalent among the general  
154 population, with an estimated 8% affected by PTSD [46]. In people with psychosis,  
155 traumatic experiences are likely to be more common, arising from restraint or coercive  
156 treatments [7], accidents or sexual assault [7] or other forms of violent victimisation  
157 [22]. The limited evidence available about the role of traumatic exposures in onset and  
158 course of psychosis in LMICs indicates variation of the association across setting [47].

159 (iii) Family communication and involvement: High 'expressed emotions' from family  
160 members, specifically hostility, critical comments and over-involvement, are associated  
161 with increased risk of relapse and hospitalisation of people with psychosis [48].  
162 However, a recent meta-analysis [49] identified only one study of expressed emotion  
163 from Africa [50]. Important cultural variability of expressed emotion is recognised [49,  
164 51]. Given the crucial role of the family in caregiving in Ethiopia and other African

165 countries [52], local evidence is urgently needed on relevant family communication  
166 patterns to inform intervention.

167 (iv) Personal recovery: Defined as *“a way of living a satisfying, hopeful and contributing life*  
168 *even within the limitations caused by illness”*[53], personal recovery is increasingly  
169 recognised as an essential goal for intervention [54]. However, the need to explore  
170 applicability of this concept in non-Western populations has been noted [55]. A study  
171 from Ethiopia explored the concept of recovery in an urban, hospital-based study [56].  
172 However, evidence from a representative sample is required to ensure innovations are  
173 based on priorities and values of people with psychosis.

174 In high-income countries, “early intervention for psychosis” (EIP) models, comprising packages of  
175 treatments for people with psychosis at first contact with services, are effective and cost-effective in  
176 those settings [57, 58]. There have been a very small number of studies from middle-income  
177 countries where intensive specialist-led EIP models were adapted [59-62], but we are not aware of  
178 any wider scale-up of these efforts. In any case, these models have been critiqued for not including  
179 efforts to achieve earlier interventions, within a ‘critical period’ of 2-3 years from psychosis onset, in  
180 order to mitigate the impacts of untreated psychosis [63, 64]. There have been only a small number  
181 of evaluations of interventions to reduce DUP in high-income countries, with limited evidence of  
182 sustainable impacts [65], except for a high quality study testing a multi-component intervention in  
183 Norway [66]. We are not aware of studies from LMIC where impact of interventions on DUP has  
184 been evaluated. In LMICs, where DUP is substantially longer [67] and where delayed access to care  
185 has been shown to be associated with poorer functional outcomes [68], interventions to reduce DUP  
186 assume even greater importance. It has been argued that early intervention models in LMICs should  
187 look very different to their high-income country counterparts, focused on a public mental health  
188 approach [69].

189



190 Efforts to expand access to care in LMICs have included training community members in proactive  
191 case identification and linkage with care in rural populations [29] [70], which have the potential to  
192 reduce DUP. However, there has been no work on interventions targeting early manifestations of  
193 psychosis or application to urban settings or homeless populations. Furthermore, evidence is needed  
194 on what interventions are required at first contact with services to optimise outcomes. Our work in  
195 Ethiopia has shown that integrating mental health care into primary healthcare in rural settings can  
196 expand access to care for people with psychosis [29], that this model is as effective as psychiatric  
197 nurse-led care [71] and delivers benefits in terms of functioning, food security [72] reduced  
198 suicidality and substantially reduced experience of discrimination and restraint [15]. However, there  
199 was minimal impact on symptom severity, 10.6% still reported experience of restraint after one year,  
200 and mortality was high. High levels of exposure to traumatic events [30] and undernutrition (23.2%  
201 underweight) were also unaddressed [73]. Furthermore, only 30% received ‘minimally adequate  
202 treatment’ over 12 months follow-up [15], driven by poverty, the lack of outreach and expectation  
203 of cure [74]. We have no evidence of interventions to optimise earlier interventions in urban or  
204 homeless populations. In Ethiopia, people who are homeless and have psychosis are trapped in a  
205 vicious cycle of poor health due to systematic exclusion from health care [75]. To optimise recovery  
206 of people with psychosis in Ethiopia and other LMICs, there is a need to achieve earlier first contact  
207 with care and more effective early interventions suited to the sociocultural and economic settings,  
208 that address contextually relevant needs for rural, urban and homeless populations.

209  
210 In SCOPE we aim to pioneer a radical rethinking of early identification and intervention models for  
211 people with psychosis at first contact in Ethiopia, grounded in a detailed understanding of contextual  
212 needs, inclusive of difficult-to-reach populations, and based on the priorities of people with  
213 psychosis.

214 The specific aims of SCOPE are to:

- 215 1) Map community resources, understand help-seeking contexts, and explore concepts of family  
216 communication and involvement and personal recovery to develop contextually appropriate  
217 measures.
- 218 2) Characterise the epidemiology of psychosis in Ethiopia:
- 219 a) Determine incidence, needs and presentation of psychosis at first contact;
- 220 b) Investigate the role of the urban environment, poverty, khat use, and traumatic  
221 experiences during the life course on onset of psychosis;
- 222 c) Identify how these exposures and additional factors, including family communication  
223 and involvement, impact on personal recovery and outcomes valued by people with  
224 psychosis over a 12-month period.
- 225 3) Based on evidence from (1) and (2), co-develop contextually grounded interventions for people  
226 with psychosis in rural, urban and homeless populations to achieve earlier and better care at  
227 first contact;
- 228 4) Pilot test interventions:
- 229 a) Assess impact of innovative identification strategies on service engagement;
- 230 b) In rural populations to determine acceptability, feasibility, affordability, preliminary  
231 efficacy estimates and potential scalability and sustainability;
- 232 c) In (1) Addis Ababa, and (2) with people who are homeless and have psychosis, to  
233 investigate acceptability and feasibility.

234

## 235 **Methods**

236 Ethical approval for SCOPE has been obtained by the Institutional Review Board of the College of  
237 Health Sciences, Addis Ababa University (Ref. 001/22/Psy; 12<sup>th</sup> January 2022) and the Research  
238 Ethics Committee of King's College London (Ref. HR/DP-21/22-26183; 5<sup>th</sup> April 2022).

239 The study designs to address the aims include (i) ethnography, resource mapping, piloting and  
240 validation studies for novel measures, and theory of change workshops (**Aim 1**); (ii) a population-  
241 based incidence study (**Aim 2a**), case-control study (**Aim 2b**) and cohort study with 12 months  
242 follow-up (**Aim 2c**) and nested qualitative study (**Aim 2c**), (iii) co-development of contextually-  
243 informed innovations (**Aim 3**), (iv) interrupted time series study (**Aim 4a**); (v) a feasibility cluster  
244 randomised controlled trial (RCT) (**Aim 4b**) and (vi) two uncontrolled pilot studies (**Aim 4c**). See Fig  
245 1.

246 Fig 1: SCOPE study components in relation to aims

### 247 **Setting**

248 The studies will be conducted in two sites: (1) contiguous, predominantly rural districts in south-  
249 central Ethiopia (Gurage zone of Southern Nations, Nationalities and People's (SNNP) Region: Misrak  
250 Meskan, Merab Meskan, Sodo and South Sodo; Oromia region: Sodo Daci and Kersana Malima;  
251 Special district: Sabata Hawas) with an estimated total population of 713,123 people; and (2) Lideta  
252 and Kirkos sub-cities of Addis Ababa, the capital of Ethiopia, with an estimated total population of  
253 416,389 in 2016. These settings are described in detail in Supplementary file 1.

254

### 255 **Aim 1: Formative studies and community engagement**

256 The formative work for SCOPE is described briefly below. More detail is provided in Supplementary  
257 file 2.

#### 258 Resource mapping

259 Research question: what are the care options, pathways and community resources to support  
260 recovery of people with psychosis?

261 Previous work from Ethiopia identified community resources with potential to be mobilised for  
262 people with mental health conditions in rural districts [76]. To map community resources in Addis

263 Ababa, we are using similar methods, including collecting input from the SCOPE community advisory  
264 boards, publicly available information, and direct observations. Geographic Information Systems  
265 (GPS) coordinates for each potential resource are being recorded using Google Maps [77]  
266 We adapted the PRIME situation analysis tool to document community and health system  
267 characteristics across all study districts, complemented by desk reviews, consultations with key  
268 informants and the advisory boards [77].

#### 269 Ethnographic study

270 Research question: what are the culturally important aspects of family communication and  
271 involvement in relation to people with psychosis in Ethiopia?  
272 Ethnographic observations in households of people with psychosis are combined with in-depth  
273 interviews with a range of stakeholders (people with psychosis, caregivers, mental health providers,  
274 community leaders). These will investigate patterns of family interaction, impacts of mental ill-  
275 health and the status of the individual with psychosis in the family. Field notes from participant  
276 observations will be analysed using an interpretative phenomenological approach [78] while  
277 interview transcripts will undergo thematic analysis [79] using NVIVO-12 software [80].  
278 We will triangulate findings from both data sources.

279

#### 280 Instrument adaptation and development study

281 Research question: what is the semantic, content, construct and convergent validity of newly  
282 developed measures of (a) family communication and involvement, and (b) personal recovery?  
283 For each construct, we will develop, pilot and validate measures using expert consensus meetings,  
284 cognitive interviewing, a pilot study and a validation study. Existing measures were first reviewed in  
285 light of local qualitative evidence (described above for family communication and involvement,  
286 personal recovery evidence based on analysis of data from RISE trial [81]) to produce a list of  
287 potentially relevant items. This will be followed by cognitive interviewing with people with psychosis

288 and caregivers to test comprehensibility and acceptability and inform development of a first version  
289 of the measures. This will be piloted in 200 people with psychosis and caregivers to test the  
290 psychometric properties. After adaptation based on the pilot, the final version will be validated with  
291 400 people with psychosis and 400 caregivers to explore construct validity (using confirmatory factor  
292 analysis) and convergent validity with symptom severity and functional impairment. As there is no  
293 definitive way to determine sample size for scale validation, depending in part on how well the items  
294 are related to the construct under investigation [82], we will follow the recommended rule of thumb  
295 to use a participant-to-item ratio of 10:1 [83], assuming that we will have no more than 40 items per  
296 scale. Consensus meetings will be held with both Ethiopian and international experts, with  
297 academic, clinical, and lived experience, to review study findings at each stage. The resulting  
298 measures will be used in the epidemiological study.

299

### 300 **Community engagement and involvement of people with lived experience**

301 We have established multi-sectoral advisory boards (including people with lived experience, family  
302 members, community leaders, traditional and religious healers, police, health care administrators,  
303 managers and practitioners, non-governmental sector and non-health government representatives  
304 e.g. youth, social care, women's affairs) in the Oromia and SNNP region rural sites (n=2) and Addis  
305 Ababa (n=1) who will provide local oversight and project ownership, support community  
306 mobilisation, and enabling trouble-shooting. Project progress and preliminary findings will be  
307 presented to the advisory boards on a regular basis to obtain feedback and contribute to the co-  
308 production of innovations to be tested in SCOPE.

309

310 The SCOPE study has benefitted from input from people with psychosis from the beginning of  
311 protocol development. Ongoing involvement is supported through (1) a co-investigator from  
312 Ethiopia with lived experience, (2) empowerment activities to support active involvement of people  
313 with psychosis from rural districts, (3) supporting the grass-roots service user association in Sodo

314 through enabling meetings and developing peer support, (4) including lived experience feedback as a  
315 standing item at advisory board meetings, and (5) close engagement with the Mental Health Service  
316 User Association of Ethiopia and Sodo service users in research processes, including planning  
317 safeguarding procedures, reviewing information leaflets and case vignettes, instrument adaptation,  
318 and co-developing community identification strategies and rights-based interventions.

319

## 320 **Aim 2: Epidemiological study**

321 Methods for the epidemiological study are closely aligned with the INTREPID study [9, 10].

### 322 Hypotheses

#### 323 Incidence study

324 (i) Incidence of psychosis will be higher in men [84] and in urban residents [85].

#### 325 Case-control study

326 (ii) Earlier age of khat initiation and/or problematic khat use [41], exposure to traumatic  
327 events prior to psychosis onset and childhood adversity [44] will be associated with  
328 increased odds of psychosis

#### 329 Cohort study

330 (iii) Maladaptive family interactions [49], exposure to traumatic events [45, 86], physical co-  
331 morbidity, and poverty will be associated with poorer 12-month clinical, functional and  
332 personal recovery, after adjusting for confounders.

### 333 Sample

334 We will recruit people with untreated psychosis (rural n=240; urban n=150), relatives (rural n=240;  
335 urban n=150) and age- and gender-matched population controls (rural n=240; urban n=150).

336 Eligibility criteria will be identical to those used in INTREPID [9] with an additional requirement that  
337 onset of psychosis was within the past two years, and extending the lower age to 15 years and  
338 removing an upper age limit (see Table 1).

339

340

341

342 Table 1: Eligibility criteria for SCOPE epidemiological study

| Inclusion criteria                                                                                                                                                                                                                                                                              | Exclusion criteria                                                                                                                                                                                                                                                     |
|-------------------------------------------------------------------------------------------------------------------------------------------------------------------------------------------------------------------------------------------------------------------------------------------------|------------------------------------------------------------------------------------------------------------------------------------------------------------------------------------------------------------------------------------------------------------------------|
| <b>Cases</b>                                                                                                                                                                                                                                                                                    |                                                                                                                                                                                                                                                                        |
| <ul style="list-style-type: none"> <li>• Aged 15 years or above</li> <li>• Resident in the catchment area</li> <li>• ICD-11 primary psychotic disorder</li> <li>• Not treated with antipsychotic medication for <math>\geq 1</math> continuous month</li> <li>• Onset within 2 years</li> </ul> | <ul style="list-style-type: none"> <li>• Moderate or severe neurodevelopmental disability (e.g. intellectual disability)</li> <li>• Clinically manifest organic cerebral disorder</li> <li>• Transient psychotic symptoms resulting from acute intoxication</li> </ul> |
| <b>Matched controls</b>                                                                                                                                                                                                                                                                         |                                                                                                                                                                                                                                                                        |
| <ul style="list-style-type: none"> <li>• Aged 15 years or above</li> <li>• Resident in the catchment area</li> <li>• Same gender as index case</li> <li>• Age within 5 years of index case</li> </ul>                                                                                           | <ul style="list-style-type: none"> <li>• Past or current psychotic disorder</li> <li>• Moderate or severe learning disability</li> <li>• Clinically manifest organic cerebral disorder</li> </ul>                                                                      |
| <b>Relatives</b>                                                                                                                                                                                                                                                                                |                                                                                                                                                                                                                                                                        |
| <ul style="list-style-type: none"> <li>• Aged 15 years or above</li> <li>• Relative or carer for a person with psychosis recruited into the study</li> </ul>                                                                                                                                    | <ul style="list-style-type: none"> <li>• Insufficient contact with person with psychosis to provide information on family burden and mental health</li> </ul>                                                                                                          |

343

344 In addition, in the Addis Ababa sub-cities we will identify people with untreated psychosis who are

345 homeless. The methodology used for the homeless sample will necessarily differ from the main

346 epidemiological study (as outlined below) but will allow quantification of the proportion of people

347 with untreated psychosis in Addis Ababa who are homeless. On the basis of our previous work, we

348 expect 31 homeless people to have untreated psychosis on initial case-finding (cross-sectionally)  
349 with further incident cases recruited during follow-up [87]. See Fig 2 for samples in the different  
350 components of the epidemiological study.

351  
352

353 Fig 1: Samples for epidemiological studies

354

355 Sample size

356 *Incidence:* With a conservative estimate of the population at risk ( $\geq 15$  years) of 741,936 (rural  
357 population of 713,123 with an estimated 62% aged 15 years or above, and an urban population of  
358 416,389 in 2016 with an estimated 72% aged 15 years or above) screened for incident cases over  
359 two years, assuming an incidence of psychosis of 18.7/100000 [84] person-years in the rural setting,  
360 this amounts to 139 new cases per year and approximately 554 people with psychosis including  
361 those who developed psychosis in the two years preceding baseline. Assuming 70% are identifiable  
362 and eligible, we expect to identify around 390 people with psychosis meeting our inclusion criteria.  
363 This sample size will have 80% power to detect an incidence rate ratio (IRR) of around 1.6 for urban  
364 exposure, in keeping with studies from high-income countries [85], and for males vs. females [84].

365 *Factors associated with onset of psychosis (case-control):* For a sample size of 390 people with  
366 psychosis and 390 controls, 16% early khat use in controls [38], we will have 80% power to detect an  
367 odds ratio of 1.7 for increased odds of early khat use in people with psychosis with  $p=0.05$ .

368 Follow-up study: Assuming 20% loss to follow-up, we will have 80% power ( $p=0.05$ ) to detect a risk  
369 difference of 18% in receipt of minimally adequate care (medication prescription and attending for 4  
370 follow-up appointments over 12 months [88]) assuming 30% receipt of minimally adequate care in  
371 non-khat chewers [89].

372 Case-finding



373 Following INTREPID methodology, building on our previous work [76] and arising from community  
374 engagement meetings, we will seek to identify people with potential psychosis through a  
375 combination of (1) proactive community-based case identification for those not in contact with care,  
376 and (2) case identification along help-seeking pathways. Proactive community-based case  
377 identification will comprise training of community health extension workers who carry out house-to-  
378 house visits for the 1000 households in their geographical catchment area, as well as other  
379 community informants, to identify people with possible psychosis. This approach has been shown to  
380 be sensitive for identification of people with psychosis in previous work by the Ethiopia team [29,  
381 90]. We will map out places where people with psychosis may seek help, including: health sector  
382 (specialist mental health services, general/primary healthcare services, health extension workers,  
383 private sector clinics); traditional and faith healing (churches, mosques, holy water sites, other  
384 healers); other sectors (police stations, prisons). We will identify focal persons (balanced by gender)  
385 in these sites and provide them with orientation and illustrated written materials in local languages.  
386 We will ask them to record contact details for any persons with features of psychosis who present to  
387 them and to inform the study team. The research team will receive referrals from focal persons and  
388 contact them proactively on a monthly basis to identify new presentations of people with possible  
389 psychosis. Descriptions of psychosis for both community-based identification and identification on  
390 help-seeking pathways will be informed by existing knowledge of local manifestations, extensive  
391 stakeholder consultation, including people with lived experience of psychosis, and emerging findings  
392 from the epidemiological study [87]. Data collectors will also regularly review health facility contact  
393 data supplemented by a registry implemented by the research team to identify people with  
394 psychosis.

395

396 Our approach to early case identification will be adapted for identification of people who are  
397 homeless and have psychosis, mapping out places where people who are homeless commonly  
398 congregate, liaising with community police and making contact early in the morning to facilitate

399 privacy [87]. To further facilitate identification, we will also carry out awareness-raising and  
400 evidence-based stigma reduction activities in local communities, in collaboration with people with  
401 psychosis, and expanding local accessibility of mental health care through integration in primary  
402 health care using effective models for this setting [71, 89].

403

#### 404 Recruitment

405 *Person with psychosis and relative:* Through linkage with the focal person/key informant, SCOPE data  
406 collectors will seek to contact any individuals identified as having probable untreated psychosis with  
407 onset in the past two years. For non-homeless persons, the location of households will be identified  
408 by working with community-based health extension workers. The person with probable psychosis  
409 and a family member will be provided with information about the study. The baseline assessment  
410 will then be scheduled. At the baseline assessment, informed consent will be sought. Our approach  
411 to assessing capacity and seeking consent builds on previous work [73] and is described below under  
412 “key ethical considerations”.

413

414 Once recruited, a mental health professional (psychiatrist or master’s level mental health  
415 practitioner) will administer a screening questionnaire, including the Psychosis Screening  
416 Questionnaire (PSQ), and combine this with clinical observation and relative reports to assess likely  
417 eligibility for the main study [91]. The PSQ has been widely used in epidemiological studies to  
418 identify persons with probable psychosis. If there is any possibility of psychosis at this stage, the  
419 mental health professional will then administer a semi-structured diagnostic interview, the  
420 Schedules for Clinical Assessment in Neuropsychiatry (SCAN)[93], to confirm eligibility. A SCAN  
421 master trainer from the UK has trained Ethiopian mental health professionals in SCAN. Inter-rater  
422 and test-retest reliability will be evaluated. Previous studies have shown that SCAN-trained mental  
423 health professionals in Ethiopia have excellent reliability [13].

424 The full battery of baseline measures (see below) will then be administered to the individual with  
425 psychosis and the relative. The assessment will be split over two (or more) sessions to reduce  
426 respondent burden.

427  
428 *Controls:* A control respondent will be identified by mapping the ten nearest neighbouring  
429 households and listing all adult residents by gender and age. All potential controls for the case (same  
430 sex, age within 5 years) will be approached in random order until an eligible control provides  
431 informed consent. This process will be repeated if no consenting control participant is found. The  
432 Psychosis Screening Questionnaire will be used to exclude current or past psychotic illness [91].

433  
434 *People with psychosis who are homeless:* For people who are homeless with probable psychosis, we  
435 will find a private place for interview. Consent procedures are described below. People who are  
436 homeless and have probable psychosis who can participate in PSQ and SCAN will do so. For those  
437 who are too unwell, we will use methodology from our previous study of people who are homeless  
438 and have psychosis and base diagnoses on systematic observation using SCAN [87].

439  
440 All people with psychosis who are identified, regardless of study participation, will be referred to  
441 mental health care integrated within local primary health care (PHC) centres or psychiatric care if  
442 indicated.

#### 443 Assessment time-points and measures

444 See Table 2 for measures and assessment time-points. In the PRIME-Ethiopia evaluation of task-  
445 shared care for people with psychosis, a 12-month follow-up period was sufficient to model impact  
446 of baseline factors on patterns of engagement with care and clinical and social functioning outcomes  
447 [7]. Measures denoted with an asterisk\* have been adapted and/or validated for the Ethiopian  
448 context previously.

449  
450 Table 2: Measures and measurement timepoints  
451

| Measure                                                                                              | Aim        | Baseline |          |         | 12-month follow-up |          |         |
|------------------------------------------------------------------------------------------------------|------------|----------|----------|---------|--------------------|----------|---------|
|                                                                                                      |            | Case     | Relative | Control | Case               | Relative | Control |
| Schedules for Assessment in Neuropsychiatry [93]*                                                    | 2a         | X        |          |         |                    |          |         |
| MRC socio-demographic schedule                                                                       | 2a, 2b, 2c | X        | X        | X       | X                  | X        | X       |
| Psychiatric and Personal History Schedule [17, 94]*                                                  | 2a, 2c     | X        | X        |         | X                  | X        |         |
| WHO Life Chart Schedule [73, 95]*                                                                    | 2c         |          |          |         | X                  | X        |         |
| WHO Disability Assessment Schedule [96, 97]*                                                         | 2a, 2c     | X        | X        | X       | X                  | X        | X       |
| Positive and Negative Symptom Scale (PANSS)[98]*                                                     | 2a, 2c     | X        |          |         | X                  |          |         |
| Patient Health Questionnaire – 9-item (depressive symptoms) validated for Ethiopia [99]              | 2a, 2c     | X        | X        | X       | X                  | X        | X       |
| Generalised Anxiety Disorder-7 (GAD-7)* [100]                                                        | 2a, 2c     | X        |          |         | X                  |          |         |
| Global Assessment of Functioning [101]*                                                              | 2a, 2c     | X        |          |         | X                  |          |         |
| Pre-morbid adjustment scale [102]                                                                    | 2a, 2b, 2c | X        | X        |         |                    |          |         |
| List of threatening events [103]*                                                                    | 2b, 2c     | X        |          | X       | X                  |          | X       |
| Alcohol, Smoking and Substance Involvement Screening Tool (ASSIST)[104]*                             | 2a, 2c     | X        | X        | X       | X                  | X        | X       |
| Problematic Khat Use Screening Tool*                                                                 | 2a, 2b, 2c | X        | X        | X       | X                  | X        | X       |
| Childhood trauma questionnaire [105]                                                                 | 2b, 2c     | X        |          | X       |                    |          |         |
| Life Events Checklist for DSM-5 and PTSD Checklist for DSM-5 [106] *                                 | 2a, 2c     | X        |          | X       | X                  |          | X       |
| Non-graphic screener for intimate partner violence [107]                                             | 2a, 2c     | X        |          | X       | X                  |          | X       |
| Oslo Social Support Scale*[108]                                                                      | 2a, 2c     | X        |          | X       | X                  |          | X       |
| Medication checklist [73]                                                                            |            | X        |          | X       | X                  |          | X       |
| Glasgow Antipsychotic Side-effect Scale [109, 110]                                                   | 2a, 2c     | X        |          |         | X                  |          |         |
| WHO-STEPS*[110]                                                                                      | 2a, 2c     | X        |          | X       | X                  |          | X       |
| Family Burden Interview Schedule*[111]                                                               | 2a, 2c     |          | X        |         |                    | X        |         |
| Laboratory investigation of malaria, anaemia                                                         | 2a, 2c     | X        |          | X       | X                  |          | X       |
| Body Mass Index                                                                                      | 2a, 2c     | X        |          | X       | X                  |          | X       |
| Tuberculosis screen                                                                                  | 2a, 2c     | X        |          | X       | X                  |          | X       |
| Adverse events [73] (mortality, homelessness, hospitalisation, victimisation, imprisonment, violence | 2c         | X        |          |         | X                  |          | X       |
| Household Food Insecurity Access Scale [112]* (HFIAS)                                                | 2a, 2c     | X        | X        | X       | X                  | X        | X       |

|                                                                           |        |   |  |   |   |  |   |
|---------------------------------------------------------------------------|--------|---|--|---|---|--|---|
| Camberwell Assessment of Need Short Appraisal Schedule [113]* (CANSAS)    | 2a, 2c | X |  | X | X |  | X |
| Discrimination and stigma sub-scale on 'unfair treatment'*[114] (DISC-12) | 2a, 2c | X |  |   | X |  |   |
| NEW: Personal Recovery measure validated for setting                      | 2a, 2c | X |  |   | X |  |   |
| NEW: Family communication (scale to be selected and adapted)              | 2a, 2c | X |  | X | X |  | X |

452

453

454 Data collection and management

455 Mental health professionals trained in SCAN will conduct the diagnostic and semi-structured clinical  
 456 assessments. Inter-rater reliability will be assessed periodically throughout the study. Lay data  
 457 collectors with a minimum of completed secondary school education will administer the fully  
 458 structured instruments. General health workers will collect the laboratory and TB investigations and  
 459 assess physical health parameters. After training, we will select data collectors who have achieved  
 460 proficiency. Based on previously developed procedures, we will ensure close supervision and data  
 461 checking in the field, with weekly data quality checks and queries resolved alongside ongoing data  
 462 collection. Data collection will be paper based for some aspects of the semi-structured measures,  
 463 but mostly electronic (using smartphones or tablets) for structured interviews and stored securely  
 464 on the university server.

465 Data analysis

466 We will use standard summary statistics, with indicators of spread and precision as appropriate (e.g.,  
 467 crude incidence rates per 100,000 person years, with 95% confidence intervals) to describe the data.  
 468 We will then use appropriate regression models to compare data between rural and urban settings  
 469 (e.g., Poisson regression for incidence rates and other count data; Cox regression for time-to-event  
 470 data; logistic regression (including multinomial) for categorical data (e.g., course type); and linear  
 471 regression for continuous data (e.g., General Assessment of Functioning score)). In building  
 472 regression models, we will first fit univariable models, then test for effect modification by pre-

473 specified variables (e.g., gender, age, setting and time) and finally adjust for potential confounders  
474 of each hypothesised association by fitting multivariable models.

475

### 476 **Aim 3: Co-development of interventions**

477 The development of innovations to improve early identification and optimise recovery for people  
478 with psychosis in rural, urban and homeless populations will follow the Medical Research Council  
479 framework for development and evaluation of complex interventions [115]. This process will be  
480 informed by: (1) repeated Theory of Change workshops [116] with key stakeholders to harness local  
481 knowledge and (2) emerging findings from the epidemiological study, nested qualitative study, and  
482 community advisory group meetings, (3) the global evidence base through focused reviews, and (4)  
483 co-production workshops.

#### 484 Theory of Change (ToC) workshops

485 We will conduct repeated ToC workshops with key stakeholders in rural and urban sites (each n=25)  
486 at months 8, 30 and 59. Stakeholders will include people with psychosis, caregivers, primary  
487 healthcare workers and managers, district health administrators, mental health professionals,  
488 religious leaders, traditional healers, community representatives, representatives from social  
489 welfare, education and law enforcement; non-governmental organisation representatives, and  
490 policy-makers. The Ethiopia research team has extensive experience with ToC methodology,  
491 including mechanisms to ensure that marginalised voices are heard [117]-[118]. Separate ToC  
492 roadmaps will be identified for rural, urban and homeless populations. Differing needs for younger  
493 and older people with psychosis will be considered. At 30 months, revised ToC maps will identify  
494 priority components of contextually relevant models for early identification and intervention for  
495 untreated/first-contact psychosis in rural, urban and homeless populations, inform development of a  
496 programme theory, and inform the intervention evaluation (process evaluation and outcomes).  
497 Following feasibility testing of interventions, final ToC maps will be produced for each population.

498

#### 499 Co-production workshops

500 Outputs from the ToC workshop will inform selection of the necessary components of the new  
501 interventions and implementation strategies for rural, urban and homeless populations, building on  
502 the global evidence base and local experience. People with psychosis will join with small working  
503 groups of researchers and practitioners to co-produce interventions, using participatory methods  
504 used previously in Ethiopia [119, 120].

505

#### 506 **Aim 4a: Interrupted time series study to evaluate identification strategies**

507 We will investigate the impact of SCOPE interventions on identification and linkage of people with  
508 untreated psychosis to mental health care using an interrupted time series study design.

509 We have established recording forms for new cases of psychosis in 65 health facilities across the  
510 study site, including information on place of residence, age and gender. We will collect monthly data  
511 from the recording forms for the following time periods (1) pre-intervention (7-12 months), during  
512 intervention (13-36 months) and post-intervention (37-48 months). We will use segmented  
513 regression analysis [121] to examine change in the number of new cases of untreated psychosis  
514 contacting mental health care in the study areas, as has been used for previous similar studies. This  
515 will allow us to identify changes beyond those related to seasonal effects and secular trends.

516

#### 517 **Aim 4b: Feasibility cluster randomised controlled trial**

518 Research question: How feasible is a randomised controlled trial (RCT) of interventions for people  
519 with psychosis at first contact with services; what are implementation processes and outcomes?

520 Trial design: Feasibility cluster RCT comparing co-developed interventions for people with untreated  
521 psychosis to integrated mental health care within primary care (Enhanced Usual Care: EUC) over a  
522 period of six months follow-up, with mixed methods process evaluation.

523 Setting: Rural districts in SNNP and Oromia regions.

524 Clusters: Clusters will be primary care health centres and their linked catchment areas. There are 23  
525 health centres in the SCOPE rural districts, with variable patient load. We will purposively select 10-

526 12 health centres with higher patient flow, including facilities located rurally and in small towns. The  
527 catchment areas of non-selected health centres will be distributed to the selected health centres.  
528 Sample size: The feasibility RCT will not be powered to evaluate intervention efficacy, but rather to  
529 test procedures for a future RCT and delivery of the innovations in routine settings. The  
530 impracticality of estimating future parameters for future fully-powered cluster RCTs from  
531 pilot/feasibility trials has been noted [122]. From months 37-50 we expect 83 untreated incident  
532 cases within the rural districts. We aim to recruit 70-80 participants, giving 6-8 per health centre.  
533 Intervention group: First contact interventions will be implemented in the selected health centres  
534 with linked community health extension workers, as an adjunct to the existing integrated primary  
535 mental health care [123][124]. The first contact interventions will be implemented for six weeks  
536 before the trial begins, with PHC workers delivering the interventions to people with psychosis who  
537 attend for care but are not eligible for the trial, to embed the intervention, assess provider  
538 competence, and ensure fidelity to the model. During the embedding period, weekly group  
539 supervision of PHC workers will be convened by a psychiatric nurse. Once the intervention begins,  
540 supervision will be monthly, although psychiatric nurses will be available for consultation on  
541 complex cases.  
542 Control group: In the control health centres, PHC workers will be given refresher training using the  
543 WHO mental health Gap Action Programme (mhGAP) intervention guideline [124] and receive  
544 monthly supervision from a psychiatric nurse (who they can consult about complex cases).  
545 Recruitment procedures: Following completion of the epidemiological study recruitment, we will  
546 continue to detect eligible participants according to the same criteria as the epidemiological study.  
547 Their contact details will be recorded using the established SCOPE surveillance system. We will  
548 approach both groups in their homes and provide the person and a designated caregiver with  
549 information about the RCT. Both will be scheduled to attend a central location for recruitment and  
550 baseline assessment if interested. Upon attendance, capacity to consent will be assessed by a  
551 mental health professional using established procedures [73]. Informed consent will be obtained,



552 and baseline measures collected. Participants will then be given an appointment at their nearest  
553 participating health centre.

554 Randomisation: Randomisation of health centres will be stratified by district and location  
555 (rural/small town), before participant recruitment starts. An independent statistician will generate  
556 the allocation list for sub-districts, which will be stored securely by the trial co-ordinator.

557 Masking: It is not possible to mask the study participants or intervention providers to the trial group  
558 allocation. Research assessors will be masked to individuals' group allocation by carrying out  
559 assessments in a central location and instructing participants not to say where they live or what type  
560 of intervention they have received.

561 Participant outcomes: Outcomes for the feasibility RCT will be informed by (1) SCOPE baseline, (2)  
562 involvement of persons with lived experience of psychosis, and (3) ToC maps (agreed indicators of  
563 success). A key outcome will include engagement in care. Assessments will be carried out at baseline  
564 and after 6 months, to allow time for participants to engage with the model to investigate feasibility  
565 outcomes.

566 Analysis of outcomes: We will use descriptive statistics to present the outcomes in each arm of the  
567 trial. Although not the focus of the feasibility RCT, we will use appropriate statistical tests (e.g. t-test,  
568 Pearson  $\chi^2$  test) as exploratory analyses of potential efficacy.

569 Process evaluation: A mixed methods process evaluation will be developed based on the ToC model  
570 and nested within the trial to investigate (1) feasibility and acceptability of trial procedures, (2) key  
571 implementation outcomes: feasibility, acceptability, appropriateness, fidelity, potential scalability  
572 and sustainability of the intervention in routine settings, and (3) contextual features of potential  
573 relevance to intervention delivery strategies and mechanisms of impact, in light of assumptions  
574 identified in the ToC map, based on the Consolidated Framework for Implementation Research  
575 (CFIR)[125] (see Table 3).

576 Table 3: Process evaluation measures  
577

|                  | Quantitative | Qualitative |
|------------------|--------------|-------------|
| Trial procedures |              |             |

|                                                                                   |                                                                                                                                                                             |   |
|-----------------------------------------------------------------------------------|-----------------------------------------------------------------------------------------------------------------------------------------------------------------------------|---|
| Numbers screened, eligible, consented, completed baseline                         | Trial log                                                                                                                                                                   |   |
| Number who lack capacity                                                          | Trial log                                                                                                                                                                   |   |
| Refusal rate                                                                      | Trial log                                                                                                                                                                   |   |
| Acceptability of random allocation                                                | Refusals post-randomisation                                                                                                                                                 | X |
| Retention in the trial                                                            | Trial log                                                                                                                                                                   |   |
| Adequacy of masking                                                               | Data collector report                                                                                                                                                       | X |
| Contamination                                                                     | Control contact with innovations                                                                                                                                            | X |
| Burden of trial assessments                                                       | Duration of assessment                                                                                                                                                      | X |
| <b>Innovations</b>                                                                |                                                                                                                                                                             |   |
| Uptake of innovations                                                             | % who engage initially                                                                                                                                                      |   |
| Retention in treatment                                                            | % who remain engaged                                                                                                                                                        |   |
| Feasibility, appropriateness and acceptability of innovations in routine settings | Frequency and duration of contacts; Feasibility of Intervention Measure (FIM), Intervention Appropriateness Measure (IAM), Acceptability of Intervention Measure (AIM)[126] | X |
| Fidelity of innovation delivery                                                   | Checklists to be developed                                                                                                                                                  |   |
| Potential sustainability                                                          | Open-ended NOMAD[127]                                                                                                                                                       | X |
| <b>Context</b>                                                                    |                                                                                                                                                                             |   |
| Contextual mapping & monitoring                                                   | Facility profiles; intervention logbooks                                                                                                                                    | X |

578  
579 Quantitative data: PHC workers involved in delivering first contact innovations (approximately 40  
580 health centre-based clinicians and approximately 40 health extension workers) will be interviewed  
581 using brief structured questionnaires eliciting their views on the intervention acceptability, feasibility  
582 and appropriateness [126], and potential sustainability [127].

583 Qualitative data: Semi-structured interviews will be conducted with people with psychosis who  
584 participated in the trial (control arm, n=5; intervention arm, n=10) and PHC workers (n=8-10), until  
585 theoretical saturation is achieved, to explore acceptability and feasibility of trial procedures; and  
586 acceptability, feasibility, appropriateness, and potential sustainability and scalability of the  
587 intervention in routine settings. Interviews will explore contextual considerations, e.g. in relation to  
588 organisational readiness and culture, motivation and opportunity to deliver the intervention, guided  
589 by CFIR domains [125] and the ToC map. Interviews will be audiotaped, transcribed in Amharic, and  
590 translated into English. Thematic analysis will be used.

591 Affordability: We will collect data to estimate intervention costs, including timesheets for  
592 intervention staff; detailed utilisation data for participants (Client Service Receipt Inventory<sup>07</sup>); data  
593 to calculate unit costs.

594

595 **Aim 4c: Uncontrolled pilot studies of interventions for people with psychosis in homeless and**  
 596 **urban populations**

597 Study design: Uncontrolled mixed methods pilot studies to investigate acceptability, feasibility,  
 598 potential sustainability and perceived impact of innovations for people with psychosis homeless  
 599 and/or living in urban settings.

600 Sample: People with untreated psychosis identified in Lideta sub-city who are 1) homeless or  
 601 abandoned (n=15) or 2) residing in a household (n= 20).

602 Recruitment: We will use the same identification and recruitment procedures as the incidence study  
 603 over 6 months.

604 Intervention: The intervention components developed as an output for Aim 3 will be implemented  
 605 over 6-8 weeks, focusing on identification, engagement, initial assessment, and acute interventions.

606 Assessment: Baseline measures will be the same as for the feasibility RCT and repeated after 6  
 607 months.

608 Mixed methods process evaluation: We will use the same approach as described for the feasibility  
 609 RCT, based on the ToC map and using CFIR [125], as indicated in Table 4.

610

611 **Table 4: Process evaluation for pilot studies.**

|                                                                                   | Quantitative                                                                                                                                                                | Qualitative |
|-----------------------------------------------------------------------------------|-----------------------------------------------------------------------------------------------------------------------------------------------------------------------------|-------------|
| <b>Innovations</b>                                                                |                                                                                                                                                                             |             |
| Uptake of innovations                                                             | % who engage initially                                                                                                                                                      |             |
| Retention in treatment                                                            | % who remain engaged                                                                                                                                                        |             |
| Feasibility, appropriateness and acceptability of innovations in routine settings | Frequency and duration of contacts; Feasibility of Intervention Measure (FIM), Intervention Appropriateness Measure (IAM), Acceptability of Intervention Measure (AIM)[126] | X           |
| Potential sustainability                                                          | Open-ended NOMAD[127]                                                                                                                                                       | X           |
| <b>Context</b>                                                                    |                                                                                                                                                                             |             |
| Contextual mapping & monitoring                                                   | Facility profiles; intervention logbooks                                                                                                                                    | X           |

612

613 Quantitative data Providers of the innovation (approximately 20 community workers and 20  
614 ‘buddies’) will be interviewed using brief structured questionnaires eliciting their views on the  
615 intervention acceptability, feasibility and appropriateness [126] and potential sustainability [127].

616 Qualitative data: In-depth interviews will be conducted with people who are homeless and have  
617 psychosis who participated in the intervention (n=15-20) or providers who contributed to the  
618 delivery of the intervention (n=10-15), until theoretical saturation is achieved, to explore the  
619 acceptability, feasibility, appropriateness, potential sustainability and scalability of the intervention,  
620 and perceived impact. Interviews will be audiotaped, transcribed in Amharic and translated into  
621 English. Thematic analysis will be used.

#### 622 **Key ethical considerations**

623 Mental health services will be established or strengthened in all primary healthcare settings in the  
624 study recruitment sites so that persons identified via community case-finding procedures will have  
625 access to care locally. To ensure sustainability and integration into the existing health system, we are  
626 working closely with community advisory board members, including health administrators, to ensure  
627 necessary system supports are in place, including revolving drug funds to access psychotropic  
628 medications, training of psychiatric nurses to provide supervision and refresher training to primary  
629 healthcare workers, and ensuring that people with lived experience of mental health care are  
630 involved in planning and developing services.

631  
632 Capacity to consent to participate in SCOPE studies will be evaluated by a mental health professional  
633 using a systematic and tested approach used previously in our research in Ethiopia [73]. If the  
634 individual lacks capacity to consent, a relative will be asked to provide permission for the individual  
635 to be included in the study. The justification for this approach is the ethical principle of justice, to  
636 ensure that services are informed by the needs of those who are most unwell, balanced against the  
637 risk to autonomy which we will minimise by not including people who refuse and re-reviewing

638 capacity. If the person subsequently regains capacity, we will then seek informed consent. If the  
639 person refuses participation at that stage, their data will be discarded. We have used this approach  
640 previously in Ethiopia [73].

641

642 For people who are homeless and have psychosis and who lack capacity to consent, we will identify  
643 a designated trusted individual who is well-placed to act in the person's interests, based on their  
644 preference, or, if they are unable to communicate a preference, a professional who is known to  
645 them (e.g. community health worker, religious leader). The person with psychosis and designated  
646 person will be informed about the study, and the designated person required to give permission.

647 With our advisory board we will further develop methods for recruiting those who lack capacity and  
648 are unknown to community members. We will apply similar safeguards to the persons with  
649 psychosis who are not homeless but who lack capacity.

650

651 People with psychosis are at increased risk of harms and threats to their human rights in both  
652 community and healing settings (biomedical and traditional/faith healing), including restraint,  
653 physical or sexual harm, exploitation (financial, sexual, labour), neglect of physical and nutritional  
654 health; and unmet basic needs. We have worked closely with the community advisory boards and  
655 people with lived experience to develop rights-based safeguarding procedures that are contextually  
656 appropriate, to avoid unintended harms.

657

### 658 **Current status**

659 The SCOPE project started formative phase activities on 22<sup>nd</sup> May 2022 and has completed the  
660 ethnographic study, scale development, piloting and validation study, and establishing surveillance  
661 methods for early case identification. We anticipate starting the epidemiological study in November  
662 2023.

663

664 **Discussion**

665 Findings from the SCOPE project will provide contextually grounded evidence from Ethiopia on the  
666 incidence of psychosis, aetiology of psychosis, unmet needs at first presentation and predictors of  
667 outcome that could be amenable to intervention. SCOPE will contribute to the small, but growing,  
668 number of longitudinal studies of people with psychosis across diverse LMICs. Through use of  
669 INTREPID methods, SCOPE data can be used in cross-country comparative analyses to illuminate our  
670 understanding of the aetiology and manifestations of psychoses and variations in the types of  
671 interventions required. SCOPE will also contribute rich, contextual understanding of the experiences  
672 of families affected by psychosis, leading to new measures of family communication and personal  
673 recovery that are relevant for this setting. Anchored in strong community engagement and  
674 involvement of people with lived experience, evidence generated by SCOPE will feed into  
675 development and feasibility testing of interventions (and methods to evaluate interventions) for  
676 earlier and better care that optimises recovery for people with psychosis.

677

678 The nature of interventions and associated implementation strategies will be informed by emerging  
679 data; however, the new interventions for people with psychosis at first contact with services will be  
680 located in primary health care rather than specialist mental health services, or sub-specialty early  
681 intervention for psychosis services. In part this decision reflects the extremely low population  
682 coverage of specialist mental health services in Ethiopia and other LMICs, which contributes to the  
683 current inaccessibility of mental health care, long duration of untreated psychosis and high out-of-  
684 pocket costs that impoverish families [32]. However, this decision is also informed by the need to  
685 promote parity of mental health and physical health care in primary health care and recognition of  
686 the benefits to the person with psychosis of staying close to community linkages to address social  
687 and economic needs.

688

689 Candidate interventions must be rights-based and community-focused, in line with best practice  
690 guidance from the World Health Organization [128]. Interventions may draw on critical time  
691 intervention (CTI) principles to develop proactive, phased and time-limited approaches to engaging  
692 people with psychosis in care to meet the multi-dimensional needs of individuals and their families  
693 [129] and/or may draw on elements of community-based rehabilitation with established  
694 effectiveness for people with chronic psychosis in rural Ethiopia [130]. Technological innovations  
695 have been used to support care for people with psychosis in high-income countries [131] and LMICs  
696 [132], although only in specialist settings. mHealth has the potential to link facility-based care with  
697 community-based health workers who can provide outreach, information and family support based  
698 on our previous materials [123, 133] and facilitate ongoing engagement [132]. Globally, evidence for  
699 the contribution of peer support workers is also accumulating [134], and this approach would build  
700 on our previous work [117] and ensure relevance and sustainability. Integrated, task-shared  
701 approaches to delivering evidence-based brief psychosocial interventions [135-138] also hold  
702 promise in LMICs, including Ethiopia, with potential to address traumatic stress symptoms,  
703 substance use problems, depressive symptoms, adherence (including family involvement to support  
704 adherence [139]) and family support. Innovative decision support tools (technology-guided) and care  
705 planning to promote physical health and address under-nutrition may have applicability in mortality  
706 reduction.

707  
708 Interventions for people with psychosis who are homeless will build on previous experience with  
709 training community health workers and police for awareness-raising, case-identification and  
710 supportive outreach of people who are homeless and have severe mental illness [87]. We will  
711 consider innovative ways of addressing unmet physical health, mental health and social needs, while  
712 overcoming access barriers. While provision of housing is considered an essential first step to  
713 treatment in high-income countries [140], this is not feasible in a low-income country setting, and  
714 many do not fulfil criteria for psychiatric admission [87]. Alternative approaches need to be

715 considered to initiate treatment while a person is still homeless. Given the complexity of the SCOPE  
716 study, we anticipate that there may need to be modifications made to the protocol to ensure  
717 feasibility and achieve the aims. These will be documented, justified and included in publications of  
718 the SCOPE findings.

## 719 Conclusions

720 The SCOPE project seeks to contribute high quality evidence on the sociocultural context of  
721 psychosis in Ethiopia and create momentum for earlier and better care through the development  
722 and testing of feasible, acceptable and scalable interventions to increase earlier uptake of care and  
723 at first contact with services to optimise recovery.

724

## 725 Funding

726 This study is funded by Wellcome Trust grant 222154/Z20/Z.

727

## 728 Acknowledgments

729 CH, AA and EM receive support from the National Institute for Health and Care Research (NIHR)  
730 through the NIHR Global Health Research Group on Homelessness and Mental Health in Africa  
731 (NIHR134325) and CH also receives support from the SPARK project (NIHR200842) using UK aid from  
732 the UK Government. The views expressed in this publication are those of the authors and not  
733 necessarily those of the NIHR or the Department of Health and Social Care. CH also receives support  
734 from WT grant 223615/Z/21/Z. TR receives a fellowship from the British Academy (PF21\210001). CL  
735 receives support from the National Institute for Health Research (NIHR) (using the UK's Official  
736 Development Assistance (ODA) Funding) and Wellcome (grant number: 221940/Z/20/Z) under the  
737 Department of Health and Social Care (DHSC)-Wellcome Partnership for Global Health Research. CM  
738 is part-funded by the ESRC (ESRC Centre for Society and Mental Health at King's College London:



739 ESRC Reference: ES/S012567/1). For the purposes of open access, the author has applied a Creative  
740 Commons Attribution (CC BY) licence to any Accepted Author Manuscript version arising from this  
741 submission.

742 Conflicts of Interest

743 No conflicts of interest.

744

745

746 References

- 747 1. McGrath J, Saha S, Chant D, Welham J. Schizophrenia: a concise overview of incidence,  
748 prevalence, and mortality. *Epidemiologic reviews*. 2008;30:67-76. Epub 2008/05/16. doi:  
749 10.1093/epirev/mxn001. PubMed PMID: 18480098.
- 750 2. Lora A, Kohn R, Levav I, McBain R, Morris J, Saxena S. Service availability and utilization and  
751 treatment gap for schizophrenic disorders: a survey in 50 low- and middle-income countries. *Bulletin*  
752 *of the World Health Organization*. 2012;90(1):47-54, a-b. Epub 2012/01/25. doi:  
753 10.2471/blt.11.089284. PubMed PMID: 22271964; PubMed Central PMCID: PMC3260570.
- 754 3. Jongsma HE, Turner C, Kirkbride JB, Jones PB. International incidence of psychotic disorders,  
755 2002&#x2013;17: a systematic review and meta-analysis. *The Lancet Public Health*. 2019;4(5):e229-  
756 e44. doi: 10.1016/S2468-2667(19)30056-8.
- 757 4. Kirkbride JB. Addressing ethnic inequalities in the pathways to care for psychosis. *BMC*  
758 *Medicine*. 2018;16(1):240. doi: 10.1186/s12916-018-1236-y.
- 759 5. Hanlon C. Next steps for meeting the needs of people with severe mental illness in low- and  
760 middle-income countries. *Epidemiology and Psychiatric Sciences*. 2017;26:348-54.
- 761 6. Wang PS, Angermeyer M, Borges G, Bruffaerts R, Chiu WT, de Girolamo G, et al. Delay and  
762 failure in treatment seeking after first onset of mental health disorders in the World Health  
763 Organization's World Mental Health Survey Initiative. *World Psychiatry*. 2007;6(3):177-85.
- 764 7. Fekadu A, Medhin G, Lund C, DeSilva M, Selamu M, Alem A, et al. The psychosis treatment  
765 gap and its consequences in rural Ethiopia. *BMC Psychiatry*. 2019;19(1):325. doi: 10.1186/s12888-  
766 019-2281-6.
- 767 8. Kebede D, Alem A, Shibre T, Negash A, Fekadu A, Fekadu D, et al. Onset and clinical course of  
768 schizophrenia in Butajira-Ethiopia. A community-based study. *Social Psychiatry and Psychiatric*  
769 *Epidemiology*. 2003;38:625-31.
- 770 9. Roberts T, Gureje O, Thara R, Hutchinson G, Cohen A, Weiss HA, et al. INTREPID II: protocol  
771 for a multistudy programme of research on untreated psychosis in India, Nigeria and Trinidad. *BMJ*  
772 *Open*. 2020;10(6):e039004. doi: 10.1136/bmjopen-2020-039004.
- 773 10. Morgan C, John S, Esan O, Hibben M, Patel V, Weiss H, et al. The incidence of psychoses in  
774 diverse settings, INTREPID (2): a feasibility study in India, Nigeria, and Trinidad. *Psychological*  
775 *Medicine*. 2016;46(9):1923-33. Epub 2016/03/28. doi: 10.1017/S0033291716000441.
- 776 11. Morgan C, Hibben M, Esan O, John S, Patel V, Weiss HA, et al. Searching for psychosis:  
777 INTREPID (1): systems for detecting untreated and first-episode cases of psychosis in diverse  
778 settings. *Social Psychiatry and Psychiatric Epidemiology*. 2015;50(6):879-93. doi: 10.1007/s00127-  
779 015-1013-6.
- 780 12. Cohen A, Padmavati R, Hibben M, Oyewusi S, John S, Esan O, et al. Concepts of madness in  
781 diverse settings: a qualitative study from the INTREPID project. *BMC Psychiatry*. 2016;16(1):388. doi:  
782 10.1186/s12888-016-1090-4.
- 783 13. Shibre T, Medhin G, Alem A, Kebede D, Teferra S, Jacobsson L, et al. Long-term clinical  
784 course and outcome of schizophrenia in rural Ethiopia: 10-year follow-up of a population-based  
785 cohort. *Schizophrenia Research*. 2014;161(2-3):414-20.
- 786 14. Alem A, Kebede D, Fekadu A, Shibre T, Fekadu D, Beyero T, et al. Clinical course and  
787 outcome of schizophrenia in a predominantly treatment-naive cohort in rural Ethiopia.  
788 *Schizophrenia bulletin*. 2009;35(3):646-54. Epub 2008/05/02. doi: 10.1093/schbul/sbn029. PubMed  
789 PMID: 18448478; PubMed Central PMCID: PMC32669573.
- 790 15. Tirfessa K, Lund C, Medhin G, Hailemichael Y, Habtamu K, Fekadu A, et al. Food insecurity  
791 and work impairment in people with severe mental disorders in a rural district of Ethiopia: a cross-  
792 sectional survey. *Social Psychiatry and Psychiatric Epidemiology*. 2019;54(9):1055-66. doi:  
793 10.1007/s00127-019-01709-7.

- 794 16. Fekadu A, Hanlon C, Medhin G, Alem A, Selamu M, Giorgis T, et al. Development of a  
795 scalable mental healthcare plan for a rural district in Ethiopia. *British Journal of Psychiatry*  
796 Supplement 2015;DOI: 10.1192/bjp.bp.114.153676.
- 797 17. Kebede D, Alem A, Shibre T, Negash A, Deyassa N, Beyero T. The sociodemographic  
798 correlates of schizophrenia in Butajira, rural Ethiopia. *Schizophr Res*. 2004;69(2-3):133-41. doi:  
799 10.1016/s0920-9964(03)00089-6. PubMed PMID: 15469186.
- 800 18. Kebede D, Alem A, Shibre T, Negash A, Deyassa N, Beyero T. Socio-demographic correlates of  
801 bipolar disorder in Butajira, rural Ethiopia. *East African medical journal*. 2005;82(1):34-9. Epub  
802 2005/08/27. PubMed PMID: 16122110.
- 803 19. Shibre T, Hanlon C, Medhin G, Alem A, Kebede D, Teferra S, et al. Suicide and suicide  
804 attempts in people with severe mental disorders in Butajira, Ethiopia: 10 year follow-up of a  
805 population-based cohort. *BMC Psychiatry*. 2014;14:150.
- 806 20. Kebede D, Alem A, Mitike G, Enquselassie F, Berhane F, Abebe Y, et al. Khat and alcohol use  
807 and risky sex behaviour among in-school and out-of-school youth in Ethiopia. *BMC Public Health*.  
808 2005;5:109. PubMed PMID: 16225665.
- 809 21. Kebede D, Fekadu A, Kelkile TS, Medhin G, Hanlon C, Mayston R, et al. The 10-year  
810 functional outcome of schizophrenia in Butajira, Ethiopia. *Heliyon*. 2019;5(3):e01272-e. doi:  
811 10.1016/j.heliyon.2019.e01272. PubMed PMID: 30923757.
- 812 22. Tsigebrhan R, Shibre T, Medhin G, Fekadu A, Hanlon C. Violence and violent victimisation in  
813 people with severe mental illness in a rural low-income country setting: a comparative cross-  
814 sectional community study. *Schizophrenia Research*. 2014;152:275-82.
- 815 23. Fekadu A, Medhin G, Kebede D, Alem A, Cleare AJ, Prince M, et al. Excess mortality in severe  
816 mental illness: 10-year population-based cohort study in rural Ethiopia. *British Journal of Psychiatry*.  
817 2015;206(4):289-96. Epub 2018/01/02. doi: 10.1192/bjp.bp.114.149112.
- 818 24. Fekadu W, Craig TKJ, Kebede D, Medhin G, Fekadu A. Multidimensional and  
819 intergenerational impact of Severe Mental Disorders. *EClinicalMedicine*. 2021;41:101151. Epub  
820 20210930. doi: 10.1016/j.eclinm.2021.101151. PubMed PMID: 34632353; PubMed Central PMCID:  
821 PMC8488481.
- 822 25. Shibre T, Kebede D, Alem A, Negash A, Deyassa N, Fekadu A, et al. Schizophrenia: illness  
823 impact on family members in a traditional society - rural Ethiopia. *Social Psychiatry and Psychiatric*  
824 *Epidemiology*. 2003;38:27-34.
- 825 26. Zergaw A, Hailemariam D, Alem A, Kebede D. A longitudinal comparative analysis of  
826 economic and family caregiver burden due to bipolar disorder. *African Journal of Psychiatry*.  
827 2008;11:191-8.
- 828 27. Shibre T, Negash A, Kullgren G, Kebede D, Alem A, Fekadu A, et al. Perception of stigma  
829 among family members of individuals with schizophrenia and major affective disorders in rural  
830 Ethiopia. *Social Psychiatry & Psychiatric Epidemiology*. 2001;36(6):299-303. PubMed PMID:  
831 11583460.
- 832 28. Baron EC, Rathod SD, Hanlon C, Prince M, Fedaku A, Kigozi F, et al. Impact of district mental  
833 health care plans on symptom severity and functioning of patients with priority mental health  
834 conditions: the Programme for Improving Mental Health Care (PRIME) cohort protocol. *BMC*  
835 *Psychiatry*. 2018;18(1):61. doi: 10.1186/s12888-018-1642-x.
- 836 29. Hailemariam M, Fekadu A, Medhin G, Prince M, Hanlon C. Equitable access to mental  
837 healthcare integrated in primary care for people with severe mental disorders in rural Ethiopia: a  
838 community-based cross-sectional study *International Mental Health Systems*. 2020;13:78.  
839 <https://doi.org/10.1186/s13033-019-0332-5>.
- 840 30. Ng LC, Medhin G, Hanlon C, Fekadu A. Trauma exposure, depression, suicidal ideation, and  
841 alcohol use in people with severe mental disorder in Ethiopia. *Social Psychiatry and Psychiatric*  
842 *Epidemiology*. 2019;54(7):835-42. doi: 10.1007/s00127-019-01673-2.

- 843 31. Forthal S, Fekadu A, Medhin G, Selamu M, Thornicroft G, Hanlon C. Rural vs urban residence  
844 and experience of discrimination among people with severe mental illnesses in Ethiopia. *BMC*  
845 *Psychiatry*. 2019;19(1):340. doi: 10.1186/s12888-019-2345-7.
- 846 32. Hailemichael Y, Hailemariam D, Tirfessa K, Docrat S, Alem A, Medhin G, et al. Catastrophic  
847 out-of-pocket payments for households of people with severe mental disorder: a comparative study  
848 in rural Ethiopia. *International Journal of Mental Health Systems*. 2019;13(1):39. doi:  
849 10.1186/s13033-019-0294-7.
- 850 33. Hailemichael Y, Hanlon C, Tirfessa K, Docrat S, Alem A, Medhin G, et al. Catastrophic health  
851 expenditure and impoverishment in households of persons with depression: a cross-sectional,  
852 comparative study in rural Ethiopia. *BMC Public Health*. 2019;19(1):930. doi: 10.1186/s12889-019-  
853 7239-6.
- 854 34. Tirfessa K, Lund C, Medhin G, Hailemichael Y, Fekadu A, Hanlon C. Food insecurity among  
855 people with severe mental disorder in a rural Ethiopian setting: a comparative, population-based  
856 study. *Epidemiology and Psychiatric Sciences*. 2019;28(4):397-407. Epub 2017/11/16. doi:  
857 10.1017/S2045796017000701.
- 858 35. Feyissa AM, Kelly JP. A review of the neuropharmacological properties of khat. *Progress in*  
859 *neuro-psychopharmacology & biological psychiatry*. 2008;32(5):1147-66. Epub 2008/06/20. doi:  
860 10.1016/j.pnpbp.2007.12.033. PubMed PMID: 18561890.
- 861 36. Onger L, Kirui F, Muniu E, Manduku V, Kirumbi L, Atwoli L, et al. Khat use and psychotic  
862 symptoms in a rural Khat growing population in Kenya: a household survey. *BMC Psychiatry*.  
863 2019;19(1):137. Epub 2019/05/09. doi: 10.1186/s12888-019-2118-3. PubMed PMID: 31064338;  
864 PubMed Central PMCID: PMC6505064.
- 865 37. Bhui K, Warfa N. Trauma, khat and common psychotic symptoms among Somali immigrants:  
866 a quantitative study. *Journal of ethnopharmacology*. 2010;132(3):549-53. Epub 2010/07/22. doi:  
867 10.1016/j.jep.2010.07.027. PubMed PMID: 20647038.
- 868 38. Ethiopia STEPS Survey 2015 Fact Sheet [Internet]. Addis Ababa, Ethiopia: EPHI:  
869 <http://www.ephi.gov.et/>; 2015
- 870 39. Alem A, Kebede D, Kullgren G. The prevalence and socio-demographic correlates of khat  
871 chewing in Butajira, Ethiopia. *Acta psychiatrica Scandinavica Supplementum*. 1999;397:84-91. Epub  
872 1999/09/02. PubMed PMID: 10470360.
- 873 40. Alemu WG, Zeleke TA, Takele WW, Mekonnen SS. Prevalence and risk factors for khat use  
874 among youth students in Ethiopia: systematic review and meta-analysis, 2018. *Annals of General*  
875 *Psychiatry*. 2020;19(1):16. doi: 10.1186/s12991-020-00265-8.
- 876 41. Odenwald M, Neuner F, Schauer M, Elbert T, Catani C, Lingenfelder B, et al. Khat use as risk  
877 factor for psychotic disorders: a cross-sectional and case-control study in Somalia. *BMC medicine*.  
878 2005;3:5. Epub 2005/02/15. doi: 10.1186/1741-7015-3-5. PubMed PMID: 15707502; PubMed  
879 Central PMCID: PMC554104.
- 880 42. Mihretu A, Teferra S, Fekadu A. What constitutes problematic khat use? An exploratory  
881 mixed methods study in Ethiopia. *Substance abuse treatment, prevention, and policy*. 2017;12(1):17.  
882 Epub 2017/03/23. doi: 10.1186/s13011-017-0100-y. PubMed PMID: 28327160; PubMed Central  
883 PMCID: PMC5361726.
- 884 43. Grubaugh AL, Zinzow HM, Paul L, Egede LE, Frueh BC. Trauma exposure and posttraumatic  
885 stress disorder in adults with severe mental illness: a critical review. *Clin Psychol Rev*.  
886 2011;31(6):883-99. Epub 2011/04/27. doi: 10.1016/j.cpr.2011.04.003. PubMed PMID: 21596012.
- 887 44. Varese F, Smeets F, Drukker M, Lieveise R, Lataster T, Viechtbauer W, et al. Childhood  
888 adversities increase the risk of psychosis: a meta-analysis of patient-control, prospective- and cross-  
889 sectional cohort studies. *Schizophrenia bulletin*. 2012;38(4):661-71. Epub 2012/03/31. doi:  
890 10.1093/schbul/sbs050. PubMed PMID: 22461484; PubMed Central PMCID: PMC3406538.
- 891 45. Mueser KT, Lu W, Rosenberg SD, Wolfe R. The trauma of psychosis: posttraumatic stress  
892 disorder and recent onset psychosis. *Schizophr Res*. 2010;116(2-3):217-27. Epub 2009/11/27. doi:  
893 10.1016/j.schres.2009.10.025. PubMed PMID: 19939633.

- 894 46. Ng LC, Stevenson A, Kalapurakkel SS, Hanlon C, Seedat S, Harerimana B, et al. National and  
895 regional prevalence of posttraumatic stress disorder in sub-Saharan Africa: A systematic review and  
896 meta-analysis. *PLOS Medicine*. 2020;17(5):e1003090. doi: 10.1371/journal.pmed.1003090.
- 897 47. Oloniniyi IO, Weiss HA, John S, Esan O, Hibben M, Patel V, et al. Life events and psychosis:  
898 case-control study from India, Nigeria, and Trinidad and Tobago. *BJPsych Open*. 2022;8(5):e168.  
899 Epub 2022/09/16. doi: 10.1192/bjo.2022.562.
- 900 48. Butzlaff RL, Hooley JM. Expressed emotion and psychiatric relapse: a metaanalysis. *Arch Gen*  
901 *Psychiatry*. 1998;55:547-52.
- 902 49. O'Driscoll C, Sener SB, Angmark A, Shaikh M. Caregiving processes and expressed emotion in  
903 psychosis, a cross-cultural, meta-analytic review. *Schizophr Res*. 2019;208:8-15. Epub 2019/04/28.  
904 doi: 10.1016/j.schres.2019.03.020. PubMed PMID: 31028000.
- 905 50. Ewhrudjakpor C. Case studies of family expressed emotion for persons living with  
906 schizophrenia in delta state of Nigeria. *European Journal of Mental Health*. 2009;4(2):247-56. doi:  
907 10.1556/EJMH.4.2009.2.5.
- 908 51. Singh SP, Harley K, Suhail K. Cultural specificity of emotional overinvolvement: a systematic  
909 review. *Schizophrenia bulletin*. 2013;39(2):449-63. Epub 2011/12/23. doi: 10.1093/schbul/sbr170.  
910 PubMed PMID: 22190078; PubMed Central PMCID: PMC3576159.
- 911 52. Mall S, Hailemariam M, Selamu M, Fekadu A, Lund C, Patel V, et al. "Restoring the person's  
912 life": a qualitative study to inform development of care for people with severe mental disorders in  
913 rural Ethiopia. *Epidemiology and Psychiatric Sciences*. 2015:DOI: 10.1017/S2045796015001006.
- 914 53. Anthony WA. Recovery from mental illness: the guiding vision of the mental health system in  
915 the 1990s. *Psychosoc Rehabil J*. 1993;16:11-23.
- 916 54. Slade M, Adams N, O'Hagan M. Recovery: past progress and future challenges. *Int Rev*  
917 *Psychiatry*. 2012;24:1-4.
- 918 55. Gamielien F, Galvaan R, Myers B, Sorsdahl K. Exploration of recovery of people living with  
919 severe mental illness (SMI) in low-income and middle-income countries (LMIC): a scoping review  
920 protocol. *BMJ Open*. 2020;10(2):e032912. Epub 2020/02/06. doi: 10.1136/bmjopen-2019-032912.  
921 PubMed PMID: 32019817; PubMed Central PMCID: PMC7044907.
- 922 56. Temesgen WA, Chien WT, Valimaki MA, Bressington D. Predictors of subjective recovery  
923 from recent-onset psychosis in a developing country: a mixed-methods study. *Social psychiatry and*  
924 *psychiatric epidemiology*. 2020.
- 925 57. Correll CU, Galling B, Pawar A, Krivko A, Bonetto C, Ruggeri M, et al. Comparison of early  
926 intervention services vs treatment as usual for early-phase psychosis: a systematic review, meta-  
927 analysis, and meta-regression. *JAMA psychiatry*. 2018;75(6):555-65.
- 928 58. Aceituno D, Vera N, Prina AM, McCrone P. Cost-Effectiveness of early intervention in  
929 psychosis: systematic review. *The British Journal of Psychiatry*. 2019;215(1):388-94.
- 930 59. Malla A, Iyer SN, Rangaswamy T, Ramachandran P, Mohan G, Taksal A, et al. Comparison of  
931 clinical outcomes following 2 years of treatment of first-episode psychosis in urban early  
932 intervention services in Canada and India. *The British journal of psychiatry : the journal of mental*  
933 *science*. 2020:1-7. Epub 2020/07/07. doi: 10.1192/bjp.2020.126. PubMed PMID: 32624012.
- 934 60. Guo X, Zhai J, Liu Z, Fang M, Wang B, Wang C, et al. Effect of antipsychotic medication alone  
935 vs combined with psychosocial intervention on outcomes of early-stage schizophrenia: a  
936 randomized, 1-year study. *Archives of general psychiatry*. 2010;67(9):895-904.
- 937 61. Valencia M, Juarez F, Ortega H. Integrated treatment to achieve functional recovery for first-  
938 episode psychosis. *Schizophrenia research and treatment*. 2012;2012.
- 939 62. Brietzke E, Araripe Neto AG, Dias Á, Mansur RB, Bressan RA. Early intervention in psychosis:  
940 a map of clinical and research initiatives in Latin America. *Brazilian Journal of Psychiatry*.  
941 2011;33:s213-s24.
- 942 63. Birchwood M, Macmillan F. Early intervention in schizophrenia. *The Australian and New*  
943 *Zealand journal of psychiatry*. 1993;27(3):374-8. Epub 1993/09/01. doi:  
944 10.3109/00048679309075792. PubMed PMID: 8250779.

- 945 64. Malla A, McGorry P. Early Intervention in Psychosis in Young People: A Population and Public  
946 Health Perspective. *American Journal of Public Health*. 2019;109(S3):S181-S4. doi:  
947 10.2105/ajph.2019.305018. PubMed PMID: 31242015.
- 948 65. Oliver D, Davies C, Crossland G, Lim S, Gifford G, McGuire P, et al. Can We Reduce the  
949 Duration of Untreated Psychosis? A Systematic Review and Meta-Analysis of Controlled  
950 Interventional Studies. *Schizophrenia bulletin*. 2018;44(6):1362-72. doi: 10.1093/schbul/sbx166.
- 951 66. Johannessen JO, Larsen TK, McGlashan T, Vaglum P. Early intervention in psychosis: The TIPS  
952 project, a multi-centre study in Scandinavia. *Psychosis: Psychological approaches and their*  
953 *effectiveness*. London, England: Gaskell/Royal College of Psychiatrists; 2000. p. 210-34.
- 954 67. Large M, Farooq S, Nielszen O, Slade T. Relationship between gross domestic product and  
955 duration of untreated psychosis in low- and middle-income countries. *Br J Psychiatry*.  
956 2008;193(4):272-8. doi: 10.1192/bjp.bp.107.041863. PubMed PMID: 18827287.
- 957 68. Farooq S, Large M, Nielszen O, Waheed W. The relationship between the duration of  
958 untreated psychosis and outcome in low-and-middle income countries: a systematic review and  
959 meta analysis. *Schizophrenia research*. 2009;109(1-3):15-23.
- 960 69. Farooq S. Early intervention for psychosis in low- and middle-income countries needs a  
961 public health approach. *Br J Psychiatry*. 2013;202(3):168-9. doi: 10.1192/bjp.bp.112.113761.  
962 PubMed PMID: 23457178.
- 963 70. Jordans MJ, Kohrt BA, Luitel NP, Lund C, Komproe IH. Proactive community case-finding to  
964 facilitate treatment seeking for mental disorders, Nepal. *Bulletin of the World Health Organization*.  
965 2017;95(7):531-6. Epub 2017/04/25. doi: 10.2471/BLT.16.189282. PubMed PMID: 28670018.
- 966 71. Hanlon C, Medhin G, Dewey ME, Prince M, Assefa E, Shibre T, et al. Efficacy and cost-  
967 effectiveness of task-shared care for people with severe mental disorders in Ethiopia (TaSCS): a  
968 single-blind, randomised, controlled, phase 3 non-inferiority trial. *Lancet Psychiatry*. 2022;9(1):59-  
969 71. doi: 10.1016/s2215-0366(21)00384-9. PubMed PMID: 34921796; PubMed Central PMCID:  
970 PMC8872807.
- 971 72. Tirfessa K, Lund C, Medhin G, Selamu M, Birhane R, Hailemichael Y, et al. Impact of  
972 integrated mental healthcare on food insecurity of households of people with severe mental illness  
973 in a rural African district: a community-based, controlled before-after study. *Tropical Medicine &*  
974 *International Health*. 2020;25(4):414-23 <https://doi.org/10.1111/tmi.13370>. . doi:  
975 10.1111/tmi.13370.
- 976 73. Hanlon C, Alem A, Medhin G, Shibre T, Ejigu DA, Negussie H, et al. Task sharing for the care  
977 of severe mental disorders in a low-income country (TaSCS): study protocol for a randomised,  
978 controlled, non-inferiority trial. *Trials*. 2016;17(1):76. doi: 10.1186/s13063-016-1191-x.
- 979 74. Hailemariam M, Fekadu A, Prince M, Hanlon C. Engaging and staying engaged: a  
980 phenomenological study of barriers to equitable access to mental healthcare for people with severe  
981 mental disorders in a rural African setting. *International Journal for Equity in Health*. 2017;16(1):156.  
982 doi: 10.1186/s12939-017-0657-0.
- 983 75. Osei Asibey B, Conroy E, Marjadi B. Health problems and healthcare service utilisation  
984 amongst homeless adults in Africa- a scoping review. *BMC Public Health*. 2020;20(1):594. doi:  
985 10.1186/s12889-020-08648-y.
- 986 76. Selamu M, Asher L, Hanlon C, Medhin G, Hailemariam M, Patel V, et al. Beyond the  
987 biomedical: community resources for mental health care in rural Ethiopia. *PLoS One*. 2015;10(5):  
988 e0126666.
- 989 77. Hanlon C, Luitel NP, Kathree T, Murhar V, Shrivasta S, Medhin G, et al. Challenges and  
990 Opportunities for Implementing Integrated Mental Health Care: A District Level Situation Analysis  
991 from Five Low- and Middle-Income Countries. *PLoS ONE*.  
992 2014;9(2):doi:10.1371/journal.pone.0088437.
- 993 78. Pietkiewicz IJ, Smith JA, editors. *A practical guide to using Interpretative Phenomenological*  
994 *Analysis in qualitative research psychology*2014.

- 995 79. Braun V, Clarke V. Using thematic analysis in psychology. *Qualitative Research in Psychology*.  
996 2006;3(2):77-101. doi: 10.1191/1478088706qp063oa.
- 997 80. Ltd QIP. NVivo12. In: Ltd QIP, editor.: [https://www.qsrinternational.com/nvivo-qualitative-](https://www.qsrinternational.com/nvivo-qualitative-data-analysis-software/home?_ga=2.211866198.333912038.1687859522-955557704.1687859522;)  
998 [data-analysis-software/home?\\_ga=2.211866198.333912038.1687859522-955557704.1687859522;](https://www.qsrinternational.com/nvivo-qualitative-data-analysis-software/home?_ga=2.211866198.333912038.1687859522-955557704.1687859522;)  
999 2020.
- 1000 81. Asher L, De Silva M, Hanlon C, Weiss HA, Birhane R, Ejigu DA, et al. Community-based  
1001 rehabilitation intervention for people with schizophrenia in Ethiopia (RISE): study protocol for a  
1002 cluster randomised controlled trial. *Trials*. 2016;17(1):1-14.
- 1003 82. MacCallum RC, Widaman KF, Zhang S, Hong S. Sample size in factor analysis. *Psychological*  
1004 *Methods*. 1999;4:84-99.
- 1005 83. Fabrigar L, Wegener D, MacCallum R, Strahan E. Evaluating the use of exploratory factor  
1006 analysis in psychological research. *Psychological Methods*. 1999;4:272-99.
- 1007 84. Jongsma HE, Turner C, Kirkbride JB, Jones PB. International incidence of psychotic disorders,  
1008 2002-2017: a systematic review and meta-analysis. *The Lancet Public Health*. 2019;4(5):e229-e44.  
1009 doi: 10.1016/S2468-2667(19)30056-8.
- 1010 85. Vassos E, Pedersen CB, Murray RM, Collier DA, Lewis CM. Meta-analysis of the association of  
1011 urbanicity with schizophrenia. *Schizophrenia bulletin*. 2012;38:1118-23.
- 1012 86. Mueser KT, Essock SM, Haines M, Wolfe R, Xie H. Posttraumatic stress disorder, supported  
1013 employment, and outcomes in people with severe mental illness. *CNS spectrums*. 2004;9(12):913-  
1014 25. Epub 2004/12/24. doi: 10.1017/s1092852900009779. PubMed PMID: 15616477.
- 1015 87. Fekadu A, Hanlon C, Gebre-Eyesus E, Agedew M, Haddis S, Teferra S, et al. Burden of mental  
1016 disorders and unmet needs among street homeless people in Addis Ababa, Ethiopia. *BMC medicine*.  
1017 2014;12(138):20.08.2014.
- 1018 88. Wang PS, Demler O, Kessler RC. Adequacy of Treatment for Serious Mental Illness in the  
1019 United States. *American Journal of Public Health*. 2002;92:92-8.
- 1020 89. Hanlon C, Medhin G, Selamu M, Birhane R, Dewey M, Tirfessa K, et al. Impact of integrated  
1021 district level mental health care on clinical and social outcomes of people with severe mental illness  
1022 in rural Ethiopia: an intervention cohort study. . *Epidemiology and Psychiatric Sciences*.  
1023 2019;<https://doi.org/10.1017/S2045796019000398>.
- 1024 90. Shibre T, Kebede D, Alem A, Negash A, Kibreab S, Fekadu A, et al. An evaluation of two  
1025 screening methods to identify cases with schizophrenia and affective disorders in a community  
1026 survey in rural Ethiopia. *International Journal of Social Psychiatry*. 2002;48(3):200-2008.  
1027 <https://doi.org/10.1177/002076402128783244>.
- 1028 91. Bebbington P, Nayani T. The psychosis screening questionnaire. *International Journal of*  
1029 *Methods in Psychiatric Research*. 1995;5(1):11-9.
- 1030 92. Bitta M, Thungana Y, Kim HH, Denckla CA, Ametaj A, Yared M, et al. Cross-country variations  
1031 in the reporting of psychotic symptoms among sub-Saharan African adults: A psychometric  
1032 evaluation of the Psychosis Screening Questionnaire. *J Affect Disord*. 2022;304:85-92. Epub  
1033 20220218. doi: 10.1016/j.jad.2022.02.048. PubMed PMID: 35183621; PubMed Central PMCID:  
1034 PMC9036658.
- 1035 93. McGuffin P, Farmer A, Harvey IA. Polydiagnostic application of operational criteria in studies  
1036 of psychotic illness. *Archives of General Psychiatry*. 1991;48:764-70.
- 1037 94. Jablensky A, Sartorius N, Ernberg G, Anker M, Korten A, Cooper JE, et al. Schizophrenia:  
1038 manifestations, incidence and course in different cultures. A World Health Organization ten-country  
1039 study. *Psychological medicine Monograph supplement*. 1992;20:1-97. Epub 1992/01/01. doi:  
1040 10.1017/s0264180100000904. PubMed PMID: 1565705.
- 1041 95. Sartorius N, Janca A, Gulbinat W. Psychiatric assessment instruments developed by the  
1042 World Health Organization. *Social psychiatry and Psychiatric Epidemiology*. 1996;31:55-69.
- 1043 96. Habtamu K, Alem A, Medhin G, Fekadu A, Dewey M, Prince M, et al. Validation of the World  
1044 Health Organization Disability Assessment Schedule in people with severe mental disorders in rural  
1045 Ethiopia. *Health and Quality of Life Outcomes*. 2017;15:64.

- 1046 97. World Health Organization. WHO psychiatric Disability Assessment Schedule. Geneva: WHO,  
1047 1988.
- 1048 98. Kay SR, Fiszbein A, Opler LA. The positive and negative syndrome scale (PANSS) for  
1049 schizophrenia. *Schizophrenia bulletin*. 1987;13:261-76.
- 1050 99. Kroenke K, Spitzer RL, Williams JB. The PHQ-9: validity of a brief depression severity  
1051 measure. *J Gen Intern Med*. 2001;16(9):606-13. doi: 10.1046/j.1525-1497.2001.016009606.x.  
1052 PubMed PMID: 11556941; PubMed Central PMCID: PMC1495268.
- 1053 100. Löwe B, Decker O, Müller S, Brähler E, Schellberg D, Herzog W, et al. Validation and  
1054 standardization of the Generalized Anxiety Disorder Screener (GAD-7) in the general population.  
1055 *Med Care*. 2008;46(3):266-74. doi: 10.1097/MLR.0b013e318160d093. PubMed PMID: 18388841.
- 1056 101. Karterud S, Pedersen G, Loevdahl H. Global assessment of Functioning-Split version (S-GAF):  
1057 background and scoring manual. Oslo, Norway: Ullevaal University Hospital, Department of  
1058 Psychiatry,, 1998.
- 1059 102. Cannon-Spoor HE, Potkin SG, Wyatt RJ. Measurement of premorbid adjustment in chronic  
1060 schizophrenia. *Schizophrenia bulletin*. 1982;8:470-84.
- 1061 103. Brugha T, Bebbington P, Tennant C, Hurry J. The List of Threatening Experiences: a subset of  
1062 12 life event categories with considerable long-term contextual threat. *Psychological medicine*.  
1063 1985;15(1):189-94. Epub 2009/07/09. doi: 10.1017/S003329170002105X.
- 1064 104. Humeniuk R, Ali R, Babor TF, Farrell M, Formigoni ML, Jittiwutikarn J, et al. Validation of the  
1065 Alcohol, Smoking And Substance Involvement Screening Test (ASSIST). *Addiction (Abingdon,*  
1066 *England)*. 2008;103(6):1039-47. Epub 2008/04/01. doi: 10.1111/j.1360-0443.2007.02114.x. PubMed  
1067 PMID: 18373724.
- 1068 105. Gossaye Y, Deyassa N, Berhane Y, Ellsberg M, Emmelin M, Ashenafi M, et al. Butajira Rural  
1069 Health Program: Women's health and life events study in rural Ethiopia (special issue). *Ethiopian*  
1070 *Journal of Health Development*. 2003;17.
- 1071 106. Weathers FW, Blake DD, Schnurr PP, Kaloupek DG, Marx BP, Keane TM. The Life Events  
1072 Checklist for DSM-5 (LEC-5). Instrument available from the National Center for PTSD at  
1073 [www.ptsd.va.gov](http://www.ptsd.va.gov) 2013.
- 1074 107. Zink T, Levin L, Putnam F, Beckstrom A. Accuracy of Five Domestic Violence Screening  
1075 Questions With Nongraphic Language. *Clinical Pediatrics*. 2007;46(2):127-34. doi:  
1076 10.1177/0009922806290029. PubMed PMID: 17325085.
- 1077 108. Dalgard OS, Dowrick C, Lehtinen V, Vazquez-Barquero JL, Casey P, Wilkinson G, et al.  
1078 Negative life events, social support and gender difference in depression. *Social Psychiatry and*  
1079 *Psychiatric Epidemiology*. 2006;41(6):444-51. doi: 10.1007/s00127-006-0051-5.
- 1080 109. Waddell L, Taylor M. A new self-rating scale for detecting atypical or second-generation  
1081 antipsychotic side effects. *Journal of Psychopharmacology*. 2008;22:238-43.
- 1082 110. Bonita R, Winkelmann R, Douglas KA, de Courten M. The WHO Stepwise Approach to  
1083 Surveillance (Steps) of Non-Communicable Disease Risk Factors. In: McQueen DV, Puska P, editors.  
1084 *Global Behavioral Risk Factor Surveillance*. Boston, MA: Springer; 2003. p. 9-22.
- 1085 111. Tessler R, Gamache G. The family burden interview schedule—short form (FBIS/SF).  
1086 *Armherst: Machmer Hall*: 1994.
- 1087 112. Coates J, Swindale A, Blinsky P. Household Food Insecurity Access Scale (HFIAS) for  
1088 Measurement of Household Food Access: Indicator Guide (v.3). Washington, DC: 2007.
- 1089 113. Thornicroft G, Beck T, Knapp M, Knudsen HC, Schene A, Tansella M, et al. International  
1090 Outcome Measures in Mental Health: Quality of Life, Needs, Service Satisfaction, Costs and Impact  
1091 on Carers. London: Gaskell; 2006.
- 1092 114. Brohan E, Clement S, Rose D, Sartorius N, Slade M, Thornicroft G. Development and  
1093 psychometric evaluation of the discrimination and stigma scale (DISC). *Psychiatry Research*.  
1094 2013;208(1):33-40.
- 1095 115. Skivington K, Matthews L, Simpson SA, Craig P, Baird J, Blazeby JM, et al. A new framework  
1096 for developing and evaluating complex interventions: update of Medical Research Council guidance.



- 1097 Bmj. 2021;374:n2061. Epub 20210930. doi: 10.1136/bmj.n2061. PubMed PMID: 34593508; PubMed  
1098 Central PMCID: PMCPMC8482308.
- 1099 116. De Silva MJ, Breuer E, Lee L, Asher L, Chowdhary N, Lund C, et al. Theory of Change: a  
1100 theory-driven approach to enhance the Medical Research Council's framework for complex  
1101 interventions. *Trials*. 2014;15(1):267. doi: 10.1186/1745-6215-15-267.
- 1102 117. Abayneh S, Lempp H, Alem A, Kohrt B, Fekadu A, Hanlon C. Developing a Theory of Change  
1103 model of service user and caregiver involvement in mental health system strengthening in primary  
1104 health care in rural Ethiopia. *International Journal of Mental Health Systems*. 2020;14:51:  
1105 <https://doi.org/10.1186/s13033-020-00383-6>.
- 1106 118. Connell J, Kubisch A. *Applying a Theory of Change Approach to the Evaluation of*  
1107 *Comprehensive Community Initiatives: Progress, Prospects, and Problems*. The Aspen Institute,  
1108 1998.
- 1109 119. Abayneh S, Lempp H, Kohrt BA, Alem A, Hanlon C. Using participatory action research to  
1110 pilot a model of service user and caregiver involvement in mental health system strengthening in  
1111 Ethiopian primary healthcare: a case study. *International Journal of Mental Health Systems*.  
1112 2022;16(1):33. doi: 10.1186/s13033-022-00545-8.
- 1113 120. Abayneh S, Lempp H, Rai S, Girma E, Getachew M, Alem A, et al. Empowerment training to  
1114 support service user involvement in mental health system strengthening in rural Ethiopia: a mixed-  
1115 methods pilot study. *BMC Health Serv Res*. 2022;22(1):880. Epub 20220708. doi: 10.1186/s12913-  
1116 022-08290-x. PubMed PMID: 35799252; PubMed Central PMCID: PMCPMC9264546.
- 1117 121. Kokota D, Lund C, Ahrens J, Breuer E, Gilfillan S. Evaluation of mhGAP training for primary  
1118 healthcare workers in Mulanje, Malawi: a quasi-experimental and time series study. *International*  
1119 *Journal of Mental Health Systems*. 2020;14:3 :<https://doi.org/10.1186/s13033-020-0337-0>.
- 1120 122. Eldridge SM, Costelloe CE, Kahan BC, Lancaster GA, Kerry SM. How big should the pilot study  
1121 for my cluster randomised trial be? *Statistical Methods in Medical Research*. 2016;25(3):1039-56.  
1122 doi: 10.1177/0962280215588242. PubMed PMID: 26071431.
- 1123 123. Fekadu A, Hanlon C, Medhin G, Alem A, Selamu M, Giorgis T, et al. Development of a  
1124 scalable mental healthcare plan for a rural district in Ethiopia. *British Journal of Psychiatry*  
1125 *Supplement* 2016;208(s4-s12):DOI: 10.1192/bjp.bp.114.153676.
- 1126 124. World Health Organization. *Mental Health Gap Action Programme Intervention Guide*  
1127 *(mhGAP-IG) for mental, neurological and substance use disorders in non-specialized health settings,*  
1128 *version 2.0*. Geneva: WHO, 2016.
- 1129 125. Damschroder LJ, Aron DC, Keith RE, Kirsh SR, Alexander JA, Lowery JC. Fostering  
1130 implementation of health services research findings into practice: a consolidated framework for  
1131 advancing implementation science. *Implementation Science*. 2009;4(1):50. doi: 10.1186/1748-5908-  
1132 4-50.
- 1133 126. Weiner BJ, Lewis CC, Stanick C, Powell BJ, Dorsey CN, Clary AS, et al. Psychometric  
1134 assessment of three newly developed implementation outcome measures. *Implementation Science*.  
1135 2017;12(1):108. doi: 10.1186/s13012-017-0635-3.
- 1136 127. Finch TL, Girling M, May CR, Mair FS, Murray E, Treweek S, et al. NoMad: Implementation  
1137 measure based on Normalization Process Theory. [Measurement instrument]. Retrieved from  
1138 <http://www.normalizationprocess.org>. Newcastle, UK: Newcastle University, 2015.
- 1139 128. World Health Organization. *Guidance on community mental health services: Promoting*  
1140 *person-centred and rights-based approaches*. Geneva: WHO, 2021.
- 1141 129. Herman D, Conover S, Felix A, Nakagawa A, Mills D. Critical Time Intervention: an empirically  
1142 supported model for preventing homelessness in high risk groups. *The journal of primary*  
1143 *prevention*. 2007;28(3-4):295-312. Epub 2007/06/02. doi: 10.1007/s10935-007-0099-3. PubMed  
1144 PMID: 17541827.
- 1145 130. Asher L, Birhane R, Weiss HA, Medhin G, Selamu M, Patel V, et al. Community-based  
1146 rehabilitation intervention for people with schizophrenia in Ethiopia (RISE): results of a 12-month

- 1147 cluster-randomised controlled trial. *Lancet Glob Health*. 2022;10(4):e530-e42. doi: 10.1016/s2214-  
1148 109x(22)00027-4. PubMed PMID: 35303462; PubMed Central PMCID: PMCPMC8938762.
- 1149 131. Välimäki M, Hätönen H, Lahti M, Kuosmanen L, Adams CE. Information and communication  
1150 technology in patient education and support for people with schizophrenia. *Cochrane Database of*  
1151 *Systematic Reviews*. 2012;(10). doi: 10.1002/14651858.CD007198.pub2. PubMed PMID: CD007198.
- 1152 132. Xu D, Xiao S, He H, Caine ED, Gloyd S, Simoni J, et al. Lay health supporters aided by mobile  
1153 text messaging to improve adherence, symptoms, and functioning among people with schizophrenia  
1154 in a resource-poor community in rural China (LEAN): A randomized controlled trial. *PLOS Medicine*.  
1155 2019;16(4):e1002785. doi: 10.1371/journal.pmed.1002785.
- 1156 133. Patel V, Hanlon C. *Where there is no psychiatrist*. Cambridge, UK: Cambridge University  
1157 Press; 2018.
- 1158 134. Puschner B, Repper J, Mahlke C, Nixdorf R, Basangwa D, Nakku J, et al. Using Peer Support in  
1159 Developing Empowering Mental Health Services (UPSIDES): Background, Rationale and  
1160 Methodology. *Ann Glob Health*. 2019;85(1):53. doi: 10.5334/aogh.2435. PubMed PMID: 30951270.
- 1161 135. Morriss R, Vinjamuri I, Faizal MA, Bolton CA, McCarthy JP. Training to recognise the early  
1162 signs of recurrence in schizophrenia. *Cochrane Database of Systematic Reviews*. 2013;(2). doi:  
1163 10.1002/14651858.CD005147.pub2. PubMed PMID: CD005147.
- 1164 136. Pitt V, Lowe D, Hill S, Pictor M, Hetrick SE, Ryan R, et al. Consumer-providers of care for  
1165 adult clients of statutory mental health services. *Cochrane Database of Systematic Reviews*.  
1166 2013;(3). doi: 10.1002/14651858.CD004807.pub2. PubMed PMID: CD004807.
- 1167 137. Reilly S, Planner C, Gask L, Hann M, Knowles S, Druss B, et al. Collaborative care approaches  
1168 for people with severe mental illness. *Cochrane Database of Systematic Reviews*. 2013;(11). doi:  
1169 10.1002/14651858.CD009531.pub2. PubMed PMID: CD009531.
- 1170 138. Asher L, Patel V, De Silva MJ. Community-based psychosocial interventions for people with  
1171 schizophrenia in low and middle-income countries: systematic review and meta-analysis. *BMC*  
1172 *Psychiatry*. 2017;17:355: DOI 10.1186/s12888-017-1516-7.
- 1173 139. Farooq S, Nazar Z, Irfan M, Akhter J, Gul E, Irfan U, et al. Schizophrenia medication  
1174 adherence in a resource-poor setting: randomised controlled trial of supervised treatment in out-  
1175 patients for schizophrenia (STOPS). *British Journal of Psychiatry*. 2011;199(6):467-72. PubMed PMID:  
1176 22130748.
- 1177 140. Hwang SW, Burns T. Health interventions for people who are homeless. *The Lancet*.  
1178 2014;384(9953):1541-7. doi: 10.1016/S0140-6736(14)61133-8.
- 1179 141. Asher L, Birhanu R, Baheretibeb Y, Fekadu A. "Medical treatments are also part of God's  
1180 gift": Holy water attendants' perspectives on a collaboration between spiritual and psychiatric  
1181 treatment for mental illness in Ethiopia. *Transcult Psychiatry*. 2021;58(4):585-99. Epub 20210525.  
1182 doi: 10.1177/13634615211015082. PubMed PMID: 34034571.
- 1183 142. Baheretibeb Y, Soklaridis S, Wondimagegn D, Martimianakis MAT, Law S. Transformative  
1184 learning in the setting of religious healers: A case study of consultative mental health workshops  
1185 with religious healers, Ethiopia. *Front Psychiatry*. 2022;13:897833. Epub 20220913. doi:  
1186 10.3389/fpsyt.2022.897833. PubMed PMID: 36177217; PubMed Central PMCID: PMCPMC9513177.
- 1187 143. ICT Services and System Development and Division of Epidemiology and Global Health.  
1188 OpenCode 4: Available from: [https://www.umu.se/en/department-of-epidemiology-and-global-  
1189 health/research/open-code2/](https://www.umu.se/en/department-of-epidemiology-and-global-health/research/open-code2/) (accessed 11th September 2023). 4.03 ed. Umeå, Sweden: Umeå  
1190 University; 2015.
- 1191 144. Van Humbeeck G, Van Audenhove C, De Hert M, Pieters G, Storms G. Expressed emotion: a  
1192 review of assessment instruments. *Clin Psychol Rev*. 2002;22(3):323-43. Epub 2007/01/05. doi:  
1193 10.1016/s0272-7358(01)00098-8. PubMed PMID: 17201189.
- 1194 145. Burlingame GM, Seaman S, Johnson JE, Whipple J, Richardson E, Rees F, et al. Sensitivity to  
1195 change of the Brief Psychiatric Rating Scale - Extended (BPRS-E): an item and subscale analysis.  
1196 *Psychological Services*. 2006;3(2):77-87.

1197

1198 **Supporting Information Captions**

1199 Supplementary File 1. Detailed description of settings

1200 Supplementary File 2: Details of formative research

1201

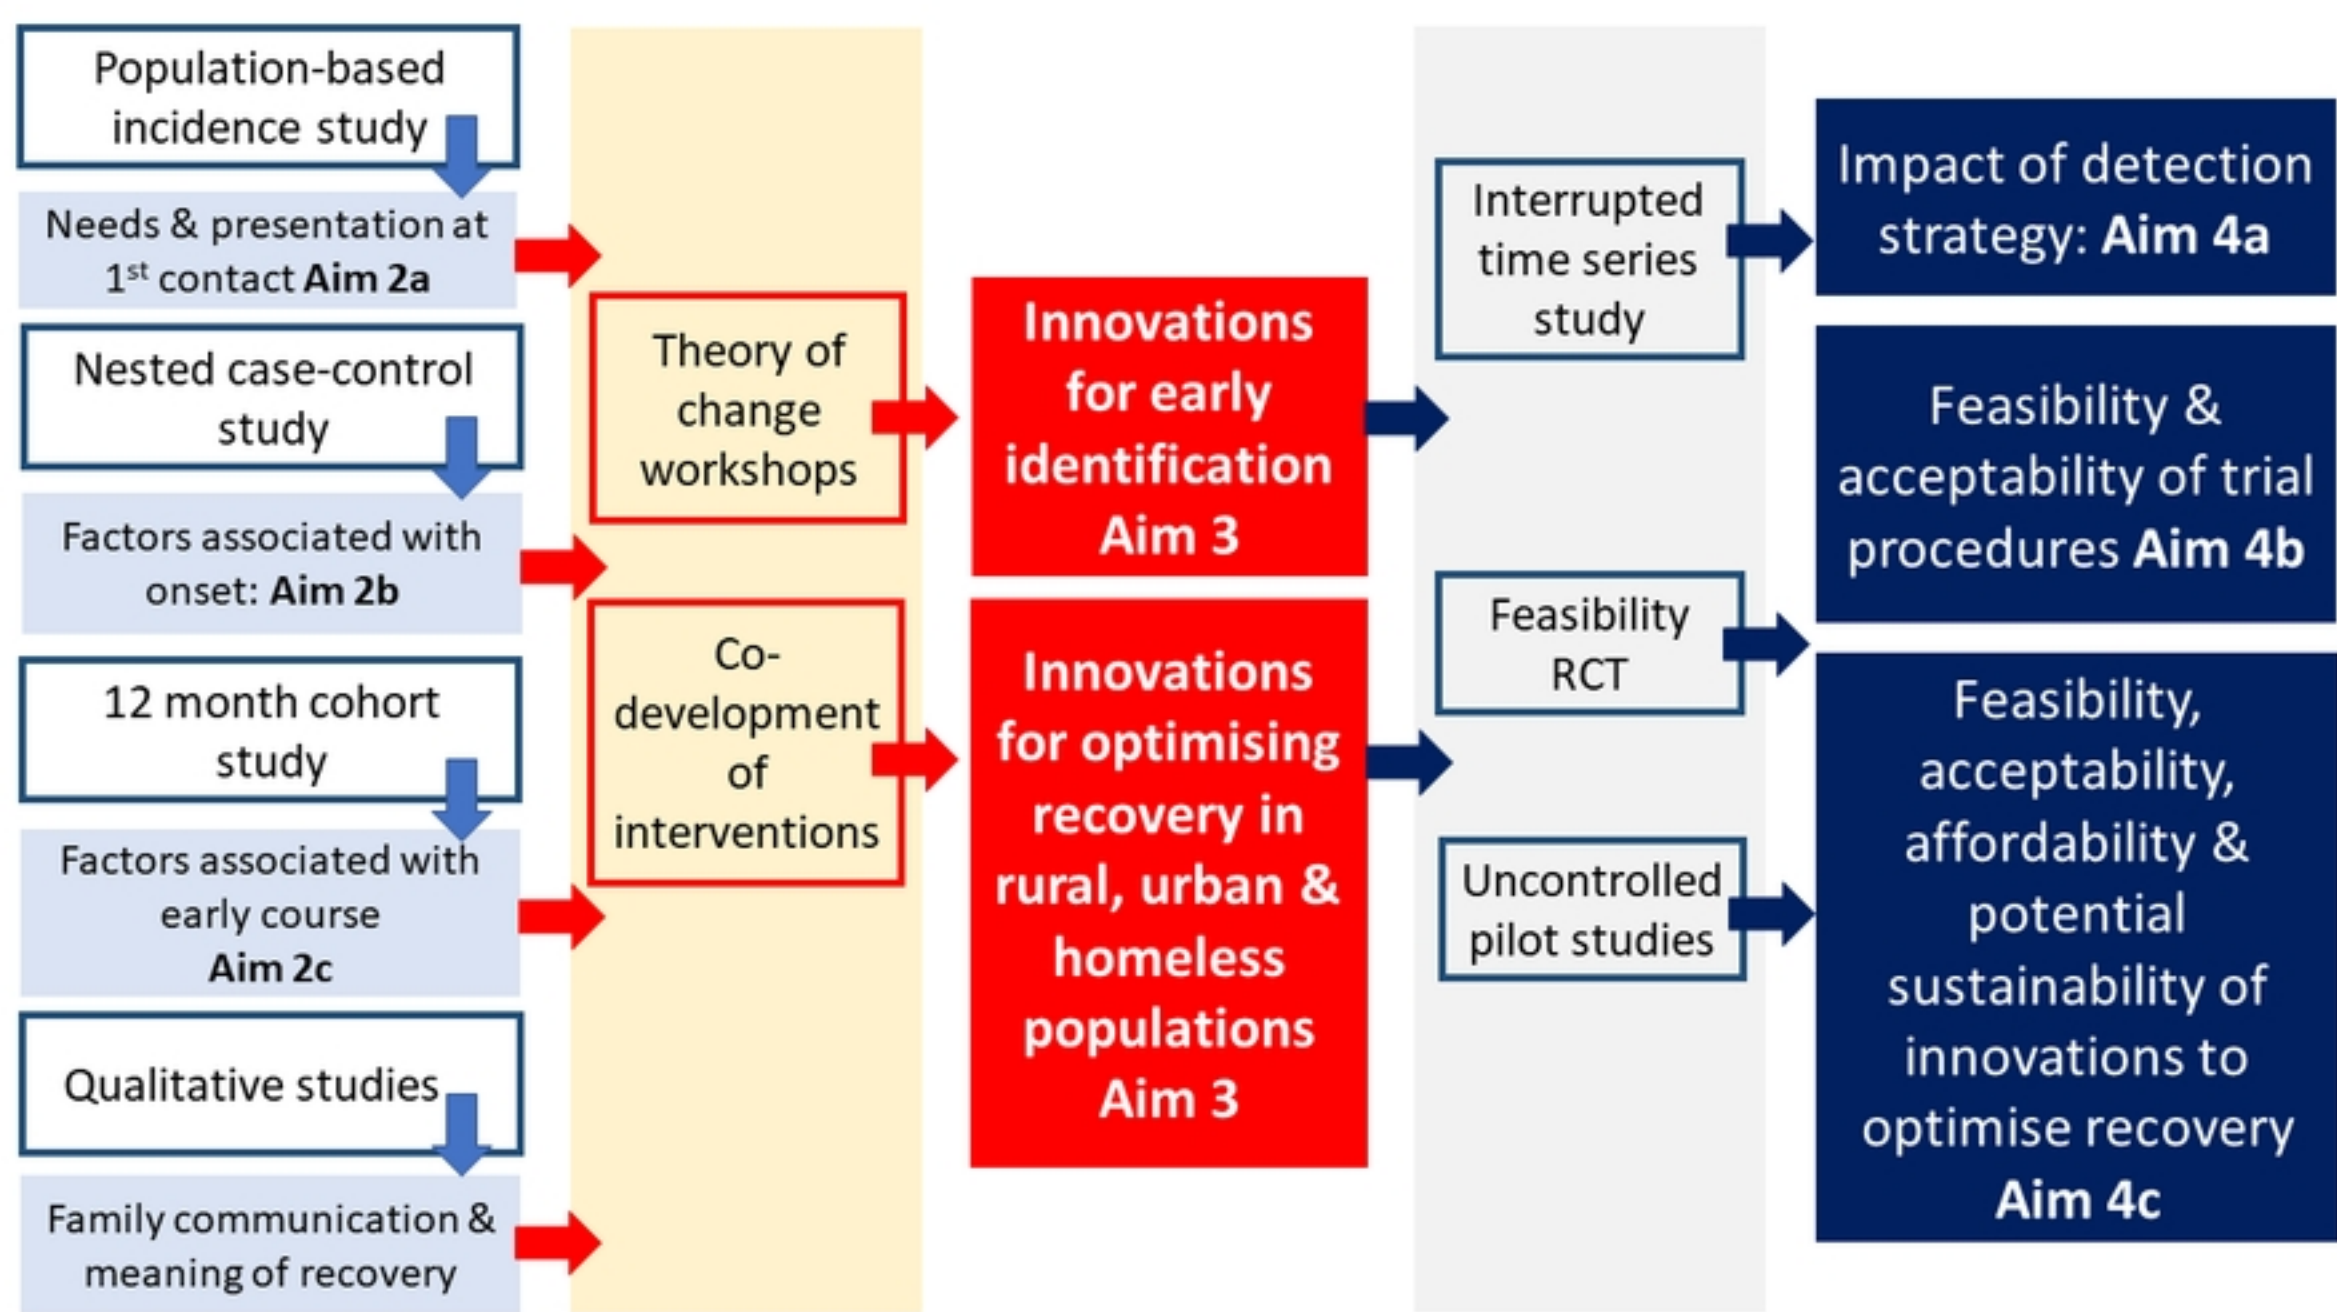

Figure
